# Supplementary material for: Paternal dietary macronutrient balance and energy intake drive metabolic and behavioral differences among offspring
Source: Nat Commun. 2024 Apr 6;15:2982. doi: 10.1038/s41467-024-46782-y (PMC10998877; doi:10.1038/s41467-024-46782-y)
Supplement: Supplementary file 4 — Supplementary Data 1-6 [file 41467_2024_46782_MOESM4_ESM.xlsx]

## Sheet: Summary
Supplementary Table 1. Diet ingredients
Supplementary Table 2. AIC values and mixture model summaries for all variables
Supplementary Table 3. Raw data F0
Supplementary Table 4. Raw data F1 female offspring
Supplementary Table 5. Raw data F1 male offspring
Supplementary Table 6. Chi-sq comparison of GAM models for all variables

## Sheet: Supp Data 1
Supplementary Table 1. Diet ingredients
Diet	1	2	3	4	5	6	7	8	9	10
Total calculated net metabolisable energy from lipids (%)	60	15	30	60	15	45	30	45	15	30
Total calculated net metabolisable energy from carbohydrates (%)	33	78	56	26	64	34	40	20	43	20
Total calculated net metabolisable energy from protein (%)	7	7	14	14	21	21	30	35	42	50
Net Metabolisable Energy (MJ / Kg)	14.7	14.7	14.7	14.7	14.7	14.7	14.7	14.7	14.7	14.7
Calculated Nutritional Parameters (%)
Protein	6.7	6.7	13.5	13.5	20.2	20.2	28.9	33.7	40.4	48.1
Total Fat	24	6	12	24	6	18	12	18	6	12.1
Crude Fibre	29.8	3.7	12.4	29.8	3.8	21.2	12.6	21.3	3.9	12.7
Total Carbohydrate	30.2	71.3	51.3	23.8	58.6	31.2	36.7	18.4	39.5	18.5
Ingredients (g/Kg)
Protein Mix*	71	71	142	142	213	213	305	356	427	508
Sucrose	51	124	88	40	101	53	63	31	68	31
Soybean Oil	150	37	75	150	37	112	75	112	37	75
Lard	70	17.5	35	70	17.5	53	35	53	17.5	35
Linseed Oil	22	5.4	11	21.5	5.4	16	11	16	5.4	11
Cellulose	320	40	134	320	41	227	135	229	42	136
Wheat Starch	208	501	358	163	410	215	254	124	274	124
Dextrinised Starch	68	163	117	53	134	70	83	83	89	40
Calcium Carbonate	13.1	13.1	13.1	13.1	13.1	13.1	13.1	13.1	13.1	13.1
Sodium Chloride	2.6	2.6	2.6	2.6	2.6	2.6	2.6	2.6	2.6	2.6
AIN93 Trace Minerals	1.4	1.4	1.4	1.4	1.4	1.4	1.4	1.4	1.4	1.4
Potassium Citrate	2.5	2.5	2.5	2.5	2.5	2.5	2.5	2.5	2.5	2.5
Potassium Dihydrogen Phosphate	6.9	6.9	6.9	6.9	6.9	6.9	6.9	6.9	6.9	6.9
Potassium Sulphate	1.6	1.6	1.6	1.6	1.6	1.6	1.6	1.6	1.6	1.6
Choline Chloride (75%)	2.5	2.5	2.5	2.5	2.5	2.5	2.5	2.5	2.5	2.5
AIN93 Vitamins	10	10	10	10	10	10	10	10	10	10
*Protein Mix (g/Kg)
Casein	428
Whey Protein Isolate	367
L Tryptophan	7
L Alanine	15
L Arginine	50
L Aspartic Acid	20
L Methionine	15
L Tyrosine	6
L Phenylalanine	7
L Glycine	20
L Leucine	20
L Histidine	10
L Serine	20
L Threonine	15

## Sheet: Supp Data 2
Supplementary Table 2. AIC values and mixture model summaries for all variables
F0							F1 - males							F1 - females
start.weight							male_wean.weight							fem_wean.weight
Model	AIC						Model	AIC						Model	AIC
1	194.89						1	179.79						1	166.1
2	193.54						2	180.78						2	164.92
3	196.84						3	185.71						3	166.95
4	201.54						4	193.12						4	169.3
5	198.5						5	187.46						5	167.57
Model 1 favoured by AIC.							Model 1 favoured by AIC.							Model 1 favoured by AIC.
Coef.	round(summary(model.AIC)$coef[, c(1:3)], 4)	df	p				Coef.	round(summary(model.AIC)$coef[, c(1:3)], 4)	df	p				Coef.	round(summary(model.AIC)$coef[, c(1:3)], 4)	df	p
Estimate	16.8117	57	0				Estimate	9.3041	48	0				Estimate	8.9475	47	0
Std. Error	0.1546	57	0				Std. Error	0.1918	48	0				Std. Error	0.1748	47	0
t value	108.748	57	0				t value	48.5199	48	0				t value	51.1746	47	0
growth							m_growth							f_growth
Model	AIC						Model	AIC						Model	AIC
1	326.9						1	153.88						1	140.67
2	319.14						2	157.66						2	140.59
3	290.4						3	162.24						3	137.56
4	286.33						4	164.26						4	140.69
5	292.37						5	163.32						5	139.48
Model 4 favoured by AIC.							Model 1 favoured by AIC.							Model 3 favoured by AIC.
Coef.	Estimate	Std. Error	t value	df	p		Coef.	round(summary(model.AIC)$coef[, c(1:3)], 4)	df	p				Coef.	Estimate	Std. Error	t value	df	p
p_P	-29.1454	68.3668	-0.4263	50	0.6717		Estimate	19.9247	48	0				p_P	14.5033	4.5174	3.2105	42	0.0025
p_C	-18.3004	10.1733	-1.7989	50	0.0781		Std. Error	0.1487	48	0				p_C	16.8235	1.1637	14.4575	42	0
p_F	89.6868	44.6937	2.0067	50	0.0502		t value	133.958	48	0				p_F	18.9226	2.7968	6.7659	42	0
cubic(p_P, p_C)	-85.4863	83.0342	-1.0295	50	0.3082									p_P:p_C	-9.354	8.7763	-1.0658	42	0.2926
cubic(p_P, p_F)	198.222	156.97	1.2628	50	0.2125									p_P:p_F	-8.3401	10.9571	-0.7612	42	0.4508
cubic(p_C, p_F)	250.536	108.648	2.3059	50	0.0253									p_C:p_F	-19.0931	9.0079	-2.1196	42	0.04
p_P:p_C	66.3885	125.688	0.5282	50	0.5997
p_P:p_F	-60.0437	133.22	-0.4507	50	0.6541
p_C:p_F	-128.943	88.5985	-1.4554	50	0.1518
p_P:p_C:p_F	436.185	279.93	1.5582	50	0.1255
weight							m_weight							f_weight
Model	AIC						Model	AIC						Model	AIC
1	328.1						1	191.74						1	194.38
2	320.08						2	195.22						2	197.06
3	300.21						3	199.55						3	199.65
4	293.67						4	204.34						4	204.54
5	302.2						5	198.89						5	201.35
Model 4 favoured by AIC.							Model 1 favoured by AIC.							Model 1 favoured by AIC.
Coef.	Estimate	Std. Error	t value	df	p		Coef.	round(summary(model.AIC)$coef[, c(1:3)], 4)	df	p				Coef.	round(summary(model.AIC)$coef[, c(1:3)], 4)	df	p
p_P	21.7821	72.6768	0.2997	50	0.7656		Estimate	30.4069	48	0				Estimate	23.175	47	0
p_C	1.7599	10.8147	0.1627	50	0.8714		Std. Error	0.2156	48	0				Std. Error	0.232	47	0
p_F	116.028	47.5113	2.4421	50	0.0182		t value	141.035	48	0				t value	99.897	47	0
cubic(p_P, p_C)	-139.749	88.2689	-1.5832	50	0.1197
cubic(p_P, p_F)	178.112	166.865	1.0674	50	0.2909
cubic(p_C, p_F)	253.107	115.497	2.1915	50	0.0331
p_P:p_C	-11.4015	133.612	-0.0853	50	0.9323
p_P:p_F	-149.751	141.618	-1.0574	50	0.2954
p_C:p_F	-162.606	94.1839	-1.7265	50	0.0904
p_P:p_C:p_F	603.625	297.577	2.0285	50	0.0479
fat							m_fat							f_fat
Model	AIC						Model	AIC						Model	AIC
1	294.22						1	120.4						1	143.23
2	285.72						2	122.79						2	144.04
3	270.13						3	126.09						3	148.05
4	264.38						4	129.44						4	152.88
5	271.75						5	127.94						5	149.52
Model 4 favoured by AIC.							Model 1 favoured by AIC.							Model 1 favoured by AIC.
Coef.	Estimate	Std. Error	t value	df	p		Coef.	round(summary(model.AIC)$coef[, c(1:3)], 4)	df	p				Coef.	round(summary(model.AIC)$coef[, c(1:3)], 4)	df	p
p_P	-45.262	56.9347	-0.795	50	0.4304		Estimate	2.9564	48	0				Estimate	2.835	47	0
p_C	-15.8209	8.4722	-1.8674	50	0.0677		Std. Error	0.1071	48	0				Std. Error	0.1391	47	0
p_F	96.654	37.2202	2.5968	50	0.0123		t value	27.5976	48	0				t value	20.3817	47	0
cubic(p_P, p_C)	-30.7286	69.1494	-0.4444	50	0.6587
cubic(p_P, p_F)	243.314	130.721	1.8613	50	0.0686
cubic(p_C, p_F)	249.725	90.48	2.76	50	0.0081
p_P:p_C	54.8855	104.671	0.5244	50	0.6023
p_P:p_F	-100.982	110.943	-0.9102	50	0.3671
p_C:p_F	-166.746	73.7833	-2.2599	50	0.0282
p_P:p_C:p_F	505.608	233.12	2.1689	50	0.0349
lean							m_lean							f_lean
Model	AIC						Model	AIC						Model	AIC
1	243.65						1	169.77						1	133.81
2	228.55						2	171.59						2	137.19
3	220.13						3	173.09						3	137.36
4	219.55						4	173.44						4	142.26
5	221.43						5	171.62						5	139.21
Model 3 favoured by AIC.							Model 1 favoured by AIC.							Model 1 favoured by AIC.
Coef.	Estimate	Std. Error	t value	df	p		Coef.	round(summary(model.AIC)$coef[, c(1:3)], 4)	df	p				Coef.	round(summary(model.AIC)$coef[, c(1:3)], 4)	df	p
p_P	7.8925	5.7544	1.3716	54	0.1759		Estimate	26.4261	48	0				Estimate	19.1827	47	0
p_C	21.3382	1.7151	12.4413	54	0		Std. Error	0.1738	48	0				Std. Error	0.1266	47	0
p_F	18.945	3.7383	5.0678	54	0		t value	152.033	48	0				t value	151.524	47	0
p_P:p_C	36.0829	11.1436	3.238	54	0.0021
p_P:p_F	47.7015	13.3629	3.5697	54	0.0008
p_C:p_F	-0.3467	12.4062	-0.0279	54	0.9778
perc.fat							m_perc.fat							f_perc.fat
Model	AIC						Model	AIC						Model	AIC
1	407.01						1	229.15						1	262.21
2	397.15						2	230.84						2	262.92
3	381.52						3	233.05						3	266.84
4	375.86						4	234.59						4	271.17
5	382.78						5	235.05						5	268.31
Model 4 favoured by AIC.							Model 1 favoured by AIC.							Model 1 favoured by AIC.
Coef.	Estimate	Std. Error	t value	df	p		Coef.	round(summary(model.AIC)$coef[, c(1:3)], 4)	df	p				Coef.	round(summary(model.AIC)$coef[, c(1:3)], 4)	df	p
p_P	-87.8999	144.159	-0.6097	50	0.5448		Estimate	9.671	48	0				Estimate	12.0287	47	0
p_C	-34.4841	21.4516	-1.6075	50	0.1142		Std. Error	0.3111	48	0				Std. Error	0.4572	47	0
p_F	248.995	94.2416	2.6421	50	0.011		t value	31.0848	48	0				t value	26.3119	47	0
cubic(p_P, p_C)	-83.1734	175.087	-0.475	50	0.6368
cubic(p_P, p_F)	564.223	330.988	1.7047	50	0.0945
cubic(p_C, p_F)	640.081	229.096	2.7939	50	0.0074
p_P:p_C	86.8668	265.027	0.3278	50	0.7445
p_P:p_F	-315.774	280.908	-1.1241	50	0.2663
p_C:p_F	-431.361	186.82	-2.309	50	0.0251
p_P:p_C:p_F	1395.55	590.262	2.3643	50	0.022
perc.lean							m_perc.lean							f_perc.lean
Model	AIC						Model	AIC						Model	AIC
1	399						1	229.12						1	255.47
2	390.3						2	231.32						2	255.68
3	375.61						3	234.52						3	258.75
4	369.57						4	236.84						4	264.89
5	376.72						5	236.52						5	260.53
Model 4 favoured by AIC.							Model 1 favoured by AIC.							Model 1 favoured by AIC.
Coef.	Estimate	Std. Error	t value	df	p		Coef.	round(summary(model.AIC)$coef[, c(1:3)], 4)	df	p				Coef.	round(summary(model.AIC)$coef[, c(1:3)], 4)	df	p
p_P	180.58	136.802	1.32	50	0.1928		Estimate	86.9605	48	0				Estimate	82.9534	47	0
p_C	129.914	20.3568	6.3818	50	0		Std. Error	0.311	48	0				Std. Error	0.4273	47	0
p_F	-151.964	89.4322	-1.6992	50	0.0955		t value	279.598	48	0				t value	194.112	47	0
cubic(p_P, p_C)	52.8148	166.152	0.3179	50	0.7519
cubic(p_P, p_F)	-553.826	314.096	-1.7632	50	0.084
cubic(p_C, p_F)	-642.762	217.404	-2.9565	50	0.0047
p_P:p_C	-88.0154	251.502	-0.35	50	0.7278
p_P:p_F	313.584	266.573	1.1764	50	0.245
p_C:p_F	426.662	177.286	2.4066	50	0.0198
p_P:p_C:p_F	-1351.6	560.139	-2.413	50	0.0195
basal.glucose							m_basal.glucose							f_basal.glucose
Model	AIC						Model	AIC						Model	AIC
1	225.58						1	134.82						1	114.64
2	223.38						2	138.51						2	117.77
3	227.23						3	138.59						3	111.13
4	228.86						4	144.19						4	116.56
5	228.59						5	139.01						5	112.81
Model 2 favoured by AIC.							Model 1 favoured by AIC.							Model 3 favoured by AIC.
Coef.	Estimate	Std. Error	t value	df	p		Coef.	round(summary(model.AIC)$coef[, c(1:3)], 4)	df	p				Coef.	Estimate	Std. Error	t value	df	p
p_P	11.3884	1.0705	10.6384	57	0		Estimate	10.277	48	0				p_P	4.2624	3.2133	1.3265	44	0.1915
p_C	11.2618	0.6478	17.3853	57	0		Std. Error	0.1234	48	0				p_C	7.9963	0.846	9.4521	44	0
p_F	8.3831	0.7983	10.5019	57	0		t value	83.2889	48	0				p_F	3.2674	1.9108	1.71	44	0.0943
														p_P:p_C	0.8961	6.2525	0.1433	44	0.8867
														p_P:p_F	20.1585	7.2184	2.7926	44	0.0077
														p_C:p_F	15.311	6.3332	2.4176	44	0.0198
glucose.iAUC							m_glucose.iAUC							f_glucose.iAUC
Model	AIC						Model	AIC						Model	AIC
1	777.45						1	581.7						1	586.56
2	768.59						2	581.97						2	590.5
3	772.19						3	580.56						3	589.96
4	773.73						4	583.02						4	591.9
5	774.02						5	582.47						5	588.08
Model 2 favoured by AIC.							Model 1 favoured by AIC.							Model 1 favoured by AIC.
Coef.	Estimate	Std. Error	t value	df	p		Coef.	round(summary(model.AIC)$coef[, c(1:3)], 4)	df	p				Coef.	round(summary(model.AIC)$coef[, c(1:3)], 4)	df	p
p_P	760.501	100.64	7.5566	57	0		Estimate	264.033	48	0				Estimate	325.549	47	0
p_C	281.845	60.899	4.6281	57	0		Std. Error	9.8629	48	0				Std. Error	11.7142	47	0
p_F	280.991	75.0455	3.7443	57	0.0004		t value	26.7705	48	0				t value	27.791	47	0
glucose.AUC							m_glucose.AUC							f_glucose.AUC
Model	AIC						Model	AIC						Model	AIC
1	796.21						1	632.11						1	611.54
2	782.4						2	633.92						2	615.52
3	776						3	637.73						3	609.48
4	781.87						4	643.72						4	611.73
5	777.95						5	639.35						5	608.06
Model 3 favoured by AIC.							Model 1 favoured by AIC.							Model 3 favoured by AIC.
Coef.	Estimate	Std. Error	t value	df	p		Coef.	round(summary(model.AIC)$coef[, c(1:3)], 4)	df	p				Coef.	Estimate	Std. Error	t value	df	p
p_P	944.081	591.217	1.5968	54	0.1161		Estimate	1141.27	48	0				p_P	-16.8075	469.064	-0.0358	44	0.9716
p_C	724.418	176.214	4.111	54	0.0001		Std. Error	16.1678	48	0				p_C	892.806	123.492	7.2297	44	0
p_F	-134.206	384.081	-0.3494	54	0.7281		t value	70.5889	48	0				p_F	422.959	278.932	1.5164	44	0.1366
p_P:p_C	1417.41	1144.92	1.238	54	0.2211									p_P:p_C	1537.95	912.721	1.685	44	0.0991
p_P:p_F	3096.35	1372.93	2.2553	54	0.0282									p_P:p_F	3306.77	1053.71	3.1382	44	0.003
p_C:p_F	3641.47	1274.64	2.8569	54	0.0061									p_C:p_F	1599.3	924.497	1.7299	44	0.0907
basal.insulin							m_basal.insulin							f_basal.insulin
Model	AIC						Model	AIC						Model	AIC
1	99.45						1	34.16						1	10.11
2	97.41						2	35.05						2	12.59
3	85.07						3	38.99						3	11.32
4	82.77						4	46.25						4	15.02
5	86.83						5	40.98						5	13.11
Model 4 favoured by AIC.							Model 1 favoured by AIC.							Model 1 favoured by AIC.
Coef.	Estimate	Std. Error	t value	df	p		Coef.	round(summary(model.AIC)$coef[, c(1:3)], 4)	df	p				Coef.	round(summary(model.AIC)$coef[, c(1:3)], 4)	df	p
p_P	-31.7522	12.5349	-2.5331	50	0.0145		Estimate	1.0105	48	0				Estimate	0.609	47	0
p_C	-2.3636	1.8653	-1.2672	50	0.211		Std. Error	0.046	48	0				Std. Error	0.0367	47	0
p_F	15.5468	8.1945	1.8972	50	0.0636		t value	21.9692	48	0				t value	16.5747	47	0
cubic(p_P, p_C)	15.828	15.2241	1.0397	50	0.3035
cubic(p_P, p_F)	79.936	28.78	2.7775	50	0.0077
cubic(p_C, p_F)	34.6993	19.9203	1.7419	50	0.0877
p_P:p_C	55.2625	23.0446	2.3981	50	0.0203
p_P:p_F	35.6196	24.4255	1.4583	50	0.151
p_C:p_F	-25.84	16.2443	-1.5907	50	0.118
p_P:p_C:p_F	10.627	51.3245	0.2071	50	0.8368
insulin.iAUC							m_insulin.iAUC							f_insulin.iAUC
Model	AIC						Model	AIC						Model	AIC
1	384.15						1	390.82						1	259.76
2	387.72						2	394.25						2	261.17
3	390.59						3	398.83						3	266.23
4	384.2						4	401						4	272.92
5	387.92						5	399.64						5	268.23
Model 1 favoured by AIC.							Model 1 favoured by AIC.							Model 1 favoured by AIC.
Coef.	round(summary(model.AIC)$coef[, c(1:3)], 4)	df	p				Coef.	round(summary(model.AIC)$coef[, c(1:3)], 4)	df	p				Coef.	round(summary(model.AIC)$coef[, c(1:3)], 4)	df	p
Estimate	10.8642	54	0				Estimate	18.992	47	0				Estimate	8.0862	44	0
Std. Error	0.9076	54	0				Std. Error	1.6543	47	0				Std. Error	0.5421	44	0
t value	11.9707	54	0				t value	11.4803	47	0				t value	14.9173	44	0
insulin.AUC							m_insulin.AUC							f_insulin.AUC
Model	AIC						Model	AIC						Model	AIC
1	493.98						1	428.65						1	311.68
2	494.1						2	431.99						2	315.45
3	487.12						3	435.65						3	318.83
4	486.65						4	441.24						4	325.99
5	488.88						5	436.83						5	320.6
Model 3 favoured by AIC.							Model 1 favoured by AIC.							Model 1 favoured by AIC.
Coef.	Estimate	Std. Error	t value	df	p		Coef.	round(summary(model.AIC)$coef[, c(1:3)], 4)	df	p				Coef.	round(summary(model.AIC)$coef[, c(1:3)], 4)	df	p
p_P	-174.248	66.668	-2.6137	51	0.0117		Estimate	48.6217	47	0				Estimate	23.222	44	0
p_C	14.8468	20.1395	0.7372	51	0.4644		Std. Error	2.415	47	0				Std. Error	0.9417	44	0
p_F	-8.2079	44.6815	-0.1837	51	0.855		t value	20.1336	47	0				t value	24.6591	44	0
p_P:p_C	445.972	130.025	3.4299	51	0.0012
p_P:p_F	449.343	154.553	2.9074	51	0.0054
p_C:p_F	0.7944	149.103	0.0053	51	0.9958
HOMA							m_HOMA							f_HOMA
Model	AIC						Model	AIC						Model	AIC
1	18.94						1	-39.14						1	-99.77
2	15.47						2	-37.74						2	-97.48
3	5.17						3	-35.61						3	-96.64
4	3.95						4	-28.1						4	-93.23
5	6.99						5	-33.73						5	-95
Model 3 favoured by AIC.							Model 1 favoured by AIC.							Model 1 favoured by AIC.
Coef.	Estimate	Std. Error	t value	df	p		Coef.	round(summary(model.AIC)$coef[, c(1:3)], 4)	df	p				Coef.	round(summary(model.AIC)$coef[, c(1:3)], 4)	df	p
p_P	-2.4981	0.9594	-2.6037	54	0.0119		Estimate	0.4616	48	0				Estimate	0.239	47	0
p_C	-0.0967	0.286	-0.3381	54	0.7366		Std. Error	0.0224	48	0				Std. Error	0.0122	47	0
p_F	-1.3559	0.6233	-2.1754	54	0.034		t value	20.5909	48	0				t value	19.5135	47	0
p_P:p_C	5.8233	1.858	3.1342	54	0.0028
p_P:p_F	7.6526	2.228	3.4347	54	0.0011
p_C:p_F	3.419	2.0685	1.6529	54	0.1042
Matsuda							m_Matsuda							f_Matsuda
Model	AIC						Model	AIC						Model	AIC
1	472.06						1	308.27						1	334.81
2	467.55						2	310.93						2	338.62
3	459.79						3	315.11						3	340.11
4	463.31						4	321.74						4	345.02
5	461.78						5	317.03						5	342.04
Model 3 favoured by AIC.							Model 1 favoured by AIC.							Model 1 favoured by AIC.
Coef.	Estimate	Std. Error	t value	df	p		Coef.	round(summary(model.AIC)$coef[, c(1:3)], 4)	df	p				Coef.	round(summary(model.AIC)$coef[, c(1:3)], 4)	df	p
p_P	165.175	52.4536	3.149	51	0.0027		Estimate	14.961	47	0				Estimate	31.6873	44	0
p_C	53.6622	15.8456	3.3866	51	0.0014		Std. Error	0.7246	47	0				Std. Error	1.2044	44	0
p_F	86.0794	35.1549	2.4486	51	0.0178		t value	20.6484	47	0				t value	26.3104	44	0
p_P:p_C	-338.317	102.302	-3.307	51	0.0017
p_P:p_F	-364.39	121.601	-2.9966	51	0.0042
p_C:p_F	-98.4973	117.313	-0.8396	51	0.405
closed.perc							m_closed.perc							f_closed.perc
Model	AIC						Model	AIC						Model	AIC
1	440.4						1	314.38						1	329.1
2	438.21						2	309.14						2	333.09
3	442.59						3	309.62						3	333.45
4	447.27						4	317.13						4	339.78
5	444.53						5	311.47						5	335.34
Model 2 favoured by AIC.							Model 2 favoured by AIC.							Model 1 favoured by AIC.
Coef.	Estimate	Std. Error	t value	df	p		Coef.	Estimate	Std. Error	t value	df	p		Coef.	round(summary(model.AIC)$coef[, c(1:3)], 4)	df	p
p_P	49.9456	6.4134	7.7877	57	0		p_P	42.3267	4.0637	10.4158	47	0		Estimate	53.86	47	0
p_C	70.0603	3.8808	18.053	57	0		p_C	57.8508	2.3846	24.2602	47	0		Std. Error	0.8924	47	0
p_F	59.0139	4.7823	12.34	57	0		p_F	50.5199	2.8816	17.532	47	0		t value	60.3533	47	0
closed.bout							m_closed.bout							f_closed.bout
Model	AIC						Model	AIC						Model	AIC
1	325.41						1	264.34						1	245.79
2	329.2						2	266.08						2	249.6
3	335.13						3	268.62						3	252.51
4	334.1						4	265.38						4	259.13
5	337.12						5	260.76						5	254.43
Model 1 favoured by AIC.							Model 5 favoured by AIC.							Model 1 favoured by AIC.
Coef.	round(summary(model.AIC)$coef[, c(1:3)], 4)	df	p				Coef.	Estimate	Std. Error	t value	df	p		Coef.	round(summary(model.AIC)$coef[, c(1:3)], 4)	df	p
Estimate	19.0167	57	0				p_P	-20.5976	23.7257	-0.8682	43	0.3901		Estimate	20.47	47	0
Std. Error	0.4587	57	0				p_C	1.5538	7.8737	0.1973	43	0.8445		Std. Error	0.3879	47	0
t value	41.4536	57	0				p_F	-6.3397	15.9068	-0.3986	43	0.6922		t value	52.7669	47	0
							p_P:p_C	194.505	73.385	2.6505	43	0.0112
							p_P:p_F	238.841	100.643	2.3732	43	0.0222
							p_C:p_F	131.832	61.3875	2.1475	43	0.0374
							p_P:p_C:p_F	-965.189	315.31	-3.0611	43	0.0038
open.perc							m_open.perc							f_open.perc
Model	AIC						Model	AIC						Model	AIC
1	413.24						1	317.5						1	326.1
2	407.46						2	320.89						2	330.02
3	412.12						3	325.95						3	330.55
4	417.59						4	331.94						4	336.95
5	412.41						5	326.57						5	332.54
Model 2 favoured by AIC.							Model 1 favoured by AIC.							Model 1 favoured by AIC.
Coef.	Estimate	Std. Error	t value	df	p		Coef.	round(summary(model.AIC)$coef[, c(1:3)], 4)	df	p				Coef.	round(summary(model.AIC)$coef[, c(1:3)], 4)	df	p
p_P	30.9828	4.9637	6.2419	57	0		Estimate	23.737	47	0				Estimate	21.124	47	0
p_C	11.4863	3.0036	3.8242	57	0.0003		Std. Error	0.7947	47	0				Std. Error	0.866	47	0
p_F	9.4332	3.7013	2.5486	57	0.0135		t value	29.87	47	0				t value	24.3925	47	0
open.bout							m_open.bout							f_open.bout
Model	AIC						Model	AIC						Model	AIC
1	333.79						1	253.79						1	265.94
2	321.98						2	254.61						2	269.88
3	323.93						3	259.01						3	274.46
4	327.79						4	258.28						4	276.5
5	323.25						5	255.23						5	275.81
Model 2 favoured by AIC.							Model 1 favoured by AIC.							Model 1 favoured by AIC.
Coef.	Estimate	Std. Error	t value	df	p		Coef.	round(summary(model.AIC)$coef[, c(1:3)], 4)	df	p				Coef.	round(summary(model.AIC)$coef[, c(1:3)], 4)	df	p
p_P	19.4335	2.4347	7.982	57	0		Estimate	14.85	47	0				Estimate	14.08	47	0
p_C	6.3212	1.4732	4.2906	57	0.0001		Std. Error	0.4202	47	0				Std. Error	0.4745	47	0
p_F	12.4142	1.8155	6.838	57	0		t value	35.339	47	0				t value	29.6717	47	0
centre.perc							m_centre.perc							f_centre.perc
Model	AIC						Model	AIC						Model	AIC
1	397.55						1	280.59						1	272.81
2	392.22						2	275.06						2	276.3
3	396.4						3	276.27						3	281.86
4	400.13						4	278.08						4	288.34
5	397.27						5	276.41						5	283.4
Model 2 favoured by AIC.							Model 2 favoured by AIC.							Model 1 favoured by AIC.
Coef.	Estimate	Std. Error	t value	df	p		Coef.	Estimate	Std. Error	t value	df	p		Coef.	round(summary(model.AIC)$coef[, c(1:3)], 4)	df	p
p_P	18.0881	4.3715	4.1377	57	0.0001		p_P	31.2911	2.89	10.8273	47	0		Estimate	25.009	47	0
p_C	18.3658	2.6453	6.9429	57	0		p_C	20.1237	1.6959	11.8662	47	0		Std. Error	0.5083	47	0
p_F	33.0841	3.2597	10.1493	57	0		p_F	25.57	2.0493	12.4772	47	0		t value	49.2044	47	0
centre.bout							m_centre.bout							f_centre.bout
Model	AIC						Model	AIC						Model	AIC
1	368.24						1	299.34						1	301.44
2	358.37						2	299.04						2	305.18
3	363.25						3	301.82						3	309.86
4	362.61						4	296.19						4	312.35
5	364.49						5	292.01						5	311.4
Model 2 favoured by AIC.							Model 5 favoured by AIC.							Model 1 favoured by AIC.
Coef.	Estimate	Std. Error	t value	df	p		Coef.	Estimate	Std. Error	t value	df	p		Coef.	round(summary(model.AIC)$coef[, c(1:3)], 4)	df	p
p_P	38.7682	3.2971	11.7581	57	0		p_P	-55.5355	32.4283	-1.7126	43	0.094		Estimate	33.64	47	0
p_C	22.3287	1.9952	11.1915	57	0		p_C	3.3559	10.7617	0.3118	43	0.7567		Std. Error	0.6767	47	0
p_F	30.1337	2.4586	12.2564	57	0		p_F	-4.7072	21.7414	-0.2165	43	0.8296		t value	49.7094	47	0
							p_P:p_C	347.943	100.303	3.4689	43	0.0012
							p_P:p_F	411.203	137.559	2.9893	43	0.0046
							p_C:p_F	185.742	83.9045	2.2137	43	0.0322
							p_P:p_C:p_F	-1458.77	430.966	-3.3849	43	0.0015
fast							m_fast							f_fast
Model	AIC						Model	AIC						Model	AIC
1	520.35						1	318.51						1	334.48
2	508.48						2	320.55						2	338.41
3	512.54						3	321.97						3	340.43
4	502.08						4	319.52						4	347.04
5	504.82						5	315.52						5	342.29
Model 4 favoured by AIC.							Model 5 favoured by AIC.							Model 1 favoured by AIC.
Coef.	Estimate	Std. Error	t value	df	p		Coef.	Estimate	Std. Error	t value	df	p		Coef.	round(summary(model.AIC)$coef[, c(1:3)], 4)	df	p
p_P	833.208	412.717	2.0188	50	0.0489		p_P	-62.1631	41.0211	-1.5154	43	0.137		Estimate	50.383	47	0
p_C	-61.66	61.4144	-1.004	50	0.3202		p_C	19.3604	13.6133	1.4222	43	0.1622		Std. Error	0.9417	47	0
p_F	-675.284	269.808	-2.5028	50	0.0156		p_F	13.6102	27.5024	0.4949	43	0.6232		t value	53.5019	47	0
cubic(p_P, p_C)	-1113.67	501.262	-2.2217	50	0.0309		p_P:p_C	402.949	126.881	3.1758	43	0.0028
cubic(p_P, p_F)	-2610.52	947.595	-2.7549	50	0.0082		p_P:p_F	454.525	174.009	2.6121	43	0.0123
cubic(p_C, p_F)	-813.434	655.886	-1.2402	50	0.2207		p_C:p_F	171.2	106.137	1.613	43	0.1141
p_P:p_C	-791.221	758.754	-1.0428	50	0.3021		p_P:p_C:p_F	-1534.26	545.162	-2.8143	43	0.0073
p_P:p_F	337.525	804.222	0.4197	50	0.6765
p_C:p_F	1691.56	534.852	3.1627	50	0.0027
p_P:p_C:p_F	-4006.98	1689.88	-2.3712	50	0.0216
liver							m_liver							f_liver
Model	AIC						Model	AIC						Model	AIC
1	9.6						1	-39.69						1	-72.31
2	-14.41						2	-36.95						2	-69.98
3	-15.77						3	-31.32						3	-65.28
4	-13.51						4	-26.35						4	-64.2
5	-14.44						5	-31.37						5	-68.97
Model 2 favoured by AIC.							Model 1 favoured by AIC.							Model 1 favoured by AIC.
Coef.	Estimate	Std. Error	t value	df	p		Coef.	round(summary(model.AIC)$coef[, c(1:3)], 4)	df	p				Coef.	round(summary(model.AIC)$coef[, c(1:3)], 4)	df	p
p_P	1.9988	0.1476	13.5447	57	0		Estimate	1.3335	48	0				Estimate	0.9953	46	0
p_C	1.2672	0.0893	14.191	57	0		Std. Error	0.0223	48	0				Std. Error	0.016	46	0
p_F	0.7187	0.11	6.5312	57	0		t value	59.8038	48	0				t value	62.0844	46	0
gWAT							m_gWAT							f_gWAT
Model	AIC						Model	AIC						Model	AIC
1	96						1	-60.24						1	-29.73
2	88.6						2	-56.47						2	-28.76
3	75.99						3	-53.81						3	-25.05
4	67.7						4	-47.13						4	-20.03
5	76.26						5	-52.16						5	-23.3
Model 4 favoured by AIC.							Model 1 favoured by AIC.							Model 1 favoured by AIC.
Coef.	Estimate	Std. Error	t value	df	p		Coef.	round(summary(model.AIC)$coef[, c(1:3)], 4)	df	p				Coef.	round(summary(model.AIC)$coef[, c(1:3)], 4)	df	p
p_P	-14.6922	11.0561	-1.3289	50	0.1899		Estimate	0.4749	48	0				Estimate	0.3585	47	0
p_C	-1.0424	1.6452	-0.6336	50	0.5292		Std. Error	0.0182	48	0				Std. Error	0.0247	47	0
p_F	18.1845	7.2277	2.5159	50	0.0151		t value	26.0536	48	0				t value	14.5316	47	0
cubic(p_P, p_C)	-0.6514	13.428	-0.0485	50	0.9615
cubic(p_P, p_F)	67.0962	25.3846	2.6432	50	0.0109
cubic(p_C, p_F)	36.8525	17.5702	2.0975	50	0.041
p_P:p_C	15.1562	20.3258	0.7457	50	0.4594
p_P:p_F	-8.9835	21.5439	-0.417	50	0.6785
p_C:p_F	-36.347	14.3279	-2.5368	50	0.0144
p_P:p_C:p_F	112.727	45.2693	2.4901	50	0.0161
sWAT							m_sWAT							f_sWAT
Model	AIC						Model	AIC						Model	AIC
1	60.78						1	-146.54						1	-86.11
2	54.41						2	-143.63						2	-92.78
3	50.55						3	-139.78						3	-87.97
4	45.63						4	-133.77						4	-81.65
5	50.79						5	-137.78						5	-85.98
Model 4 favoured by AIC.							Model 1 favoured by AIC.							Model 2 favoured by AIC.
Coef.	Estimate	Std. Error	t value	df	p		Coef.	round(summary(model.AIC)$coef[, c(1:3)], 4)	df	p				Coef.	Estimate	Std. Error	t value	df	p
p_P	-15.2165	9.1983	-1.6543	50	0.1043		Estimate	0.2283	48	0				p_P	0.158	0.0768	2.0577	47	0.0452
p_C	-0.7385	1.3687	-0.5395	50	0.5919		Std. Error	0.0078	48	0				p_C	0.2688	0.0426	6.3179	47	0
p_F	15.2596	6.0132	2.5377	50	0.0143		t value	29.1845	48	0				p_F	0.5002	0.0535	9.3439	47	0
cubic(p_P, p_C)	7.9752	11.1716	0.7139	50	0.4786
cubic(p_P, p_F)	57.3908	21.1191	2.7175	50	0.009
cubic(p_C, p_F)	30.4742	14.6178	2.0847	50	0.0422
p_P:p_C	19.4271	16.9104	1.1488	50	0.2561
p_P:p_F	-2.8901	17.9237	-0.1612	50	0.8725
p_C:p_F	-30.4292	11.9203	-2.5527	50	0.0138
p_P:p_C:p_F	76.2033	37.6624	2.0233	50	0.0484
BAT							m_BAT							f_BAT
Model	AIC						Model	AIC						Model	AIC
1	-125.16						1	-247.13						1	-250.25
2	-136.95						2	-243.44						2	-248.7
3	-142.95						3	-240.95						3	-250.48
4	-141.79						4	-233.43						4	-252.76
5	-141.4						5	-238.96						5	-249.05
Model 3 favoured by AIC.							Model 1 favoured by AIC.							Model 4 favoured by AIC.
Coef.	Estimate	Std. Error	t value	df	p		Coef.	round(summary(model.AIC)$coef[, c(1:3)], 4)	df	p				Coef.	Estimate	Std. Error	t value	df	p
p_P	-0.3381	0.2792	-1.2109	54	0.2312		Estimate	0.0871	48	0				p_P	-1.2409	0.5243	-2.3667	40	0.0229
p_C	0.0558	0.0832	0.6709	54	0.5051		Std. Error	0.0029	48	0				p_C	-0.093	0.0758	-1.2273	40	0.2269
p_F	-0.5433	0.1814	-2.9952	54	0.0041		t value	29.8594	48	0				p_F	0.8713	0.3423	2.5455	40	0.0149
p_P:p_C	0.6488	0.5407	1.1998	54	0.2355									cubic(p_P, p_C)	0.8005	0.6967	1.1489	40	0.2574
p_P:p_F	1.6794	0.6484	2.5899	54	0.0123									cubic(p_P, p_F)	3.1636	1.2059	2.6233	40	0.0123
p_C:p_F	1.562	0.602	2.5947	54	0.0122									cubic(p_C, p_F)	2.0187	0.8365	2.4134	40	0.0205
														p_P:p_C	2.2519	0.9754	2.3087	40	0.0262
														p_P:p_F	1.2011	1.002	1.1987	40	0.2377
														p_C:p_F	-1.432	0.6714	-2.1328	40	0.0391
														p_P:p_C:p_F	-0.0577	2.1205	-0.0272	40	0.9784
Quad							m_Quad							f_Quad
Model	AIC						Model	AIC						Model	AIC
1	-151.02						1	-211.38						1	-89.75
2	-159.12						2	-209.06						2	-89.74
3	-154.82						3	-205.73						3	-86.72
4	-149.68						4	-205.11						4	-82.67
5	-152.89						5	-208.47						5	-86.31
Model 2 favoured by AIC.							Model 1 favoured by AIC.							Model 1 favoured by AIC.
Coef.	Estimate	Std. Error	t value	df	p		Coef.	round(summary(model.AIC)$coef[, c(1:3)], 4)	df	p				Coef.	round(summary(model.AIC)$coef[, c(1:3)], 4)	df	p
p_P	0.5331	0.0442	12.0658	57	0		Estimate	0.2881	48	0				Estimate	0.2463	47	0
p_C	0.3359	0.0267	12.5636	57	0		Std. Error	0.0041	48	0				Std. Error	0.0135	47	0
p_F	0.3204	0.0329	9.7244	57	0		t value	69.5398	48	0				t value	18.1928	47	0
Gastroc							m_Gastroc							f_Gastroc
Model	AIC						Model	AIC						Model	AIC
1	-236.92						1	-251.9						1	-230.09
2	-242.57						2	-250.18						2	-226.92
3	-245.51						3	-245.73						3	-227.3
4	-240.28						4	-243.37						4	-230.93
5	-243.77						5	-245.45						5	-226.32
Model 3 favoured by AIC.							Model 1 favoured by AIC.							Model 1 favoured by AIC.
Coef.	Estimate	Std. Error	t value	df	p		Coef.	round(summary(model.AIC)$coef[, c(1:3)], 4)	df	p				Coef.	round(summary(model.AIC)$coef[, c(1:3)], 4)	df	p
p_P	0.1892	0.1188	1.5931	54	0.117		Estimate	0.2994	48	0				Estimate	0.2385	47	0
p_C	0.198	0.0354	5.5912	54	0		Std. Error	0.0028	48	0				Std. Error	0.0033	47	0
p_F	0.0601	0.0772	0.7783	54	0.4398		t value	107.541	48	0				t value	71.6989	47	0
p_P:p_C	0.2475	0.23	1.076	54	0.2867
p_P:p_F	0.5989	0.2758	2.171	54	0.0343
p_C:p_F	0.5698	0.2561	2.2248	54	0.0303
kidney							m_kidney							f_kidney
Model	AIC						Model	AIC						Model	AIC
1	-240.74						1	-227.94						1	-268.53
2	-284.34						2	-227.98						2	-265.25
3	-299.22						3	-224.75						3	-262.27
4	-294.1						4	-220.43						4	-257.66
5	-297.26						5	-222.83						5	-260.28
Model 3 favoured by AIC.							Model 1 favoured by AIC.							Model 1 favoured by AIC.
Coef.	Estimate	Std. Error	t value	df	p		Coef.	round(summary(model.AIC)$coef[, c(1:3)], 4)	df	p				Coef.	round(summary(model.AIC)$coef[, c(1:3)], 4)	df	p
p_P	-0.0305	0.0759	-0.4013	54	0.6898		Estimate	0.183	48	0				Estimate	0.1285	47	0
p_C	0.0968	0.0226	4.2789	54	0.0001		Std. Error	0.0035	48	0				Std. Error	0.0023	47	0
p_F	0.0367	0.0493	0.7437	54	0.4603		t value	51.9639	48	0				t value	56.7483	47	0
p_P:p_C	0.515	0.147	3.5027	54	0.0009
p_P:p_F	0.8147	0.1763	4.6209	54	0
p_C:p_F	0.1261	0.1637	0.7704	54	0.4444
liver triglycerides							m_liver triglycerides							f_liver triglycerides
Model	AIC						Model	AIC						Model	AIC
1	531.66						1	276.59						1	348
2	517.88						2	278.77						2	346.08
3	522.39						3	282.21						3	351.59
4	524.87						4	282.09						4	350.95
5	524.38						5	282.95						5	351.45
Model 2 favoured by AIC.							Model 1 favoured by AIC.							Model 1 favoured by AIC.
Coef.	Estimate	Std. Error	t value	df	p		Coef.	round(summary(model.AIC)$coef[, c(1:3)], 4)	df	p				Coef.	round(summary(model.AIC)$coef[, c(1:3)], 4)	df	p
p_P	-6.8844	12.4577	-0.5526	57	0.5827		Estimate	11.6681	47	0				Estimate	18.3716	46	0
p_C	53.3301	7.5383	7.0745	57	0		Std. Error	0.5279	47	0				Std. Error	1.1684	46	0
p_F	3.2422	9.2894	0.349	57	0.7284		t value	22.1042	47	0				t value	15.7235	46	0
testis							m_testis							f_uterus
Model	AIC						Model	AIC						Model	AIC
1	-397.19						1	-353.82						1	-266.48
2	-402.1						2	-351.25						2	-263.37
3	-400.86						3	-348.69						3	-258.21
4	-399.22						4	-344.87						4	-254.54
5	-399.39						5	-349						5	-258.03
Model 2 favoured by AIC.							Model 1 favoured by AIC.							Model 1 favoured by AIC.
Coef.	Estimate	Std. Error	t value	df	p		Coef.	round(summary(model.AIC)$coef[, c(1:3)], 4)	df	p				Coef.	round(summary(model.AIC)$coef[, c(1:3)], 4)	df	p
p_P	0.1148	0.0058	19.6775	57	0		Estimate	0.099	48	0				Estimate	0.0709	47	0
p_C	0.0934	0.0035	26.4659	57	0		Std. Error	0.001	48	0				Std. Error	0.0023	47	0
p_F	0.0903	0.0043	20.7492	57	0		t value	96.5681	48	0				t value	30.6578	47	0
SV							m_SV
Model	AIC						Model	AIC
1	-239.19						1	-293.98
2	-257.26						2	-290.21
3	-261.36						3	-289.53
4	-261.81						4	-289.97
5	-259.42						5	-287.53
Model 3 favoured by AIC.							Model 1 favoured by AIC.
Coef.	Estimate	Std. Error	t value	df	p		Coef.	round(summary(model.AIC)$coef[, c(1:3)], 4)	df	p
p_P	0.0189	0.1041	0.1818	54	0.8565		Estimate	0.1195	48	0
p_C	0.1257	0.031	4.0516	54	0.0002		Std. Error	0.0018	48	0
p_F	-0.0499	0.0676	-0.7384	54	0.4635		t value	64.8237	48	0
p_P:p_C	0.2486	0.2016	1.2332	54	0.2228
p_P:p_F	0.7239	0.2417	2.9949	54	0.0041
p_C:p_F	0.2926	0.2244	1.3039	54	0.1978
food_intake
Model	AIC
1	72.72
2	61.95
3	20.76
4	-2.54
5	20.33
Model 4 favoured by AIC.
Coef.	Estimate	Std. Error	t value	df	p
p_P	-18.8164	6.1571	-3.056	50	0.0036
p_C	5.7492	0.9162	6.275	50	0
p_F	5.8252	4.0251	1.4472	50	0.1541
cubic(p_P, p_C)	21.9052	7.4781	2.9293	50	0.0051
cubic(p_P, p_F)	59.0053	14.1367	4.1739	50	0.0001
cubic(p_C, p_F)	-9.9222	9.7848	-1.014	50	0.3154
p_P:p_C	35.8484	11.3195	3.167	50	0.0026
p_P:p_F	37.9856	11.9978	3.1661	50	0.0026
p_C:p_F	-5.6699	7.9792	-0.7106	50	0.4806
p_P:p_C:p_F	-67.5069	25.2105	-2.6777	50	0.01
litter
Model	AIC
1	312.65
2	311.46
3	310.11
4	314.55
5	311.9
Model 2 favoured by AIC.
Coef.	Estimate	Std. Error	t value	df	p
p_P	2.3173	2.2304	1.039	57	0.3032
p_C	5.7581	1.3496	4.2664	57	0.0001
p_F	9.6841	1.6631	5.8228	57	0
sex.ratio
Model	AIC
1	-12.69
2	-9.42
3	-9.03
4	-2.9
5	-7.03
Model 1 favoured by AIC.
Coef.	round(summary(model.AIC)$coef[, c(1:3)], 4)	df	p
Estimate	0.5388	49	0
Std. Error	0.0289	49	0
t value	18.6705	49	0

## Sheet: Supp Data 3
Supplementary Table 3. Raw data F0
MouseID	Diet	p_P	p_C	p_F	food_intake	eaten.P	eaten.C	eaten.F	start.weight	growth	weight	fat	lean	perc.fat	perc.lean	basal.glucose	glucose.iAUC	glucose.AUC	basal.insulin	insulin.iAUC	insulin.AUC	HOMA	Matsuda	closed.perc	closed.bout	open.perc	open.bout	centre.perc	centre.bout	fast	liver	gWAT	sWAT	BAT	quad	gastroc	kidney	testis	SV	liver.trig		litter	female	male	sex.ratio
P1.1	1	7	33	60	3.43333	3.5329	16.6551	30.282	15.3	7.1	22.4	2.08	19.6	9.28571	87.5	9.1	172.5	865.5	0.400796	11.1083	23.1322	0.1621	37.0063	59.3	24	9.6	14	31.1	33	0	0.8443	0.3673	0.2867	0.0516	0.3296	0.2352	0.1005	0.0939	0.0905	20.7855		7	2	5	0.714286
P1.2	1	7	33	60	3.20833	3.30138	15.5636	28.2975	17.7	7.1	24.8	1.38	22.33	5.56452	90.0403	9.35	738.375	1579.88	0.329938	3.48975	13.3879	0.137108	39.1481	52.2	22	14.3	10	33.5	31	0	0.9674	0.3763	0.2356	0.0495	0.3984	0.2689	0.1116	0.09125	0.1275	13.6049		3	1	2	0.666667
P1.3	1	7	33	60	3.64	3.74556	17.6576	32.1048	17.4	7.5	24.9	2.55	21.41	10.241	85.9839	7.95	264.375	979.875	0.221021	6.17395	12.8046	0.078094	67.3491	53.1	19	18.1	13	28.8	31	0	0.9123	0.4757	0.2208	0.0576	0.265	0.2389	0.12155	0.09825	0.11495	28.4169		9	3	6	0.666667
P1.4	1	7	33	60	3.80833	3.91878	18.4742	33.5895	19.7	9.3	29	2.74	24.92	9.44828	85.931	8.8	415.5	1207.5	0.630668	8.37039	27.2904	0.246661	23.3835	76.5	16	3.8	9	22.9	23	28.3	0.7892	0.5911	0.3007	0.1016	0.2846	0.2641	0.1558	0.09035	0.08705	17.8732		6	1	5	0.833333
P1.5	1	7	33	60	3.45	3.55005	16.7359	30.429	15	9.8	24.8	1.45	22.31	5.84677	89.9597	10.45	236.625	1118.62	0.372282	10.6461	21.8145	0.172904	32.4557	69.1	15	13.3	15	21.3	26	30.6	0.9613	0.3314	0.2224	0.0586	0.4032	0.2654	0.11915	0.0849	0.1128	10.8651		9	5	4	0.444444
P1.6	1	7	33	60	3.615	3.71983	17.5364	31.8843	15.2	7	22.2	2.04	19.12	9.18919	86.1261	7.05	412.125	1046.62	0.442589	4.55195	17.8296	0.138678	41.4418	68.4	18	16.4	14	17.5	31	39.4	0.727	0.36	0.2392	0.0565	0.2422	0.2259	0.12295	0.0789	0.0619	21.0922		10	6	4	0.4
P2.1	2	7	78	15	3.50833	3.61008	40.2266	7.73588	18	9.4	27.4	4.6	21.88	16.7883	79.854	10.25	247.125	1169.62	0.498753	7.60144	22.564	0.22721	27.2247	80	21	6.5	2	13.7	23	41.1	1.0347	0.7471	0.5584	0.12	0.2903	0.2929	0.1347	0.09565	0.1561	35.1123		7	3	4	0.571429
P2.2	2	7	78	15	3.80833	3.91878	43.6664	8.39738	17.3	10.1	27.4	4.29	22.02	15.6569	80.365	10.05	283.875	1129.88	0.523853	4.30174	17.7366	0.233988	30.7866	84.4	19	0.6	3	15	21	33.5	1.1079	0.6969	0.3927	0.122	0.2716	0.2819	0.13105	0.0973	0.1391	26.8027		7	2	5	0.714286
P2.3	2	7	78	15	3.22	3.31338	36.9205	7.1001	17.9	5.2	23.1	2.05	20.24	8.87446	87.619	6.7	245.25	848.25	0.209889	3.61771	9.91439	0.0625004	91.9544	60.1	14	16.5	6	23.4	19	44.1	0.9654	0.4665	0.1888	0.0484	0.3309	0.2001	0.1046	0.0883	0.06125	27.7916		6	2	4	0.666667
P2.4	2	7	78	15	3.60833	3.71298	41.3732	7.95638	17.6	8.2	25.8	2.62	21.93	10.155	85	9.75	502.125	1249.12	0.415163	5.73536	18.1903	0.179904	32.9736	83.1	18	6	6	10.9	21	0	0.8555	0.5289	0.2531	0.1061	0.3256	0.241	0.1284	0.10785	0.1331	16.3547		8	2	6	0.75
P2.5	2	7	78	15	3.38333	3.48145	38.7933	7.46025	17.3	10.5	27.8	4.33	22.33	15.5755	80.3237	13.2	282.75	1209.75	0.862122	4.55797	26.885	0.505778	16.4371	48.6	24	25.2	16	26.2	37	0	1.1254	1.1658	0.6898	0.1605	0.3836	0.2612	0.12745	0.09335	0.1653	35.9282		5	2	3	0.6
P2.6	2	7	78	15	3.77667	3.88619	43.3033	8.32755	18.2	18	36.2	11.82	23.23	32.6519	64.1713	11.7	173.25	1226.25	1.07708	20.5494	52.8617	0.560081	11.0643	71.7	15	1.8	3	26.5	17	0	1.747	2.2463	1.7025	0.4587	0.3663	0.2897	0.1387	0.08845	0.18095	88.5902		8	6	2	0.25
P3.1	3	14	56	30	2.40833	4.95635	19.8254	10.6207	17.9	14.9	32.8	8.12	23.73	24.7561	72.3476	10.85	335.625	1312.12	1.09759	5.83332	38.7611	0.529284	12.8493	50.9	14	30.8	10	18.4	22	34.4	1.0605	1.3135	0.5366	0.1333	0.3169	0.2392	0.15355	0.09915	0.1609	19.348		10	4	6	0.6
P3.2	3	14	56	30	2.69167	5.53945	22.1578	11.8703	15.6	14	29.6	5.66	22.78	19.1216	76.9595	10.35	385.125	1303.12	0.809674	4.49301	28.4223	0.37245	17.9495	67.7	20	11.1	9	21.3	25	40	1.094	0.9555	0.456	0.1667	0.2844	0.3052	0.14335	0.08395	0.13605	16.1214		3	1	2	0.666667
P3.3	3	14	56	30	2.99833	6.17057	24.6823	13.2226	18.1	19.8	37.9	12.85	23.91	33.905	63.0871	13	327.75	1497.75	2.36938			1.36898		56.5	18	16.6	12	27	29	36.9	1.7685	1.8677	1.6486	0.4524	0.3811	0.3075	0.14975	0.09105	0.154	99.5071		10	2	8	0.8
P3.4	3	14	56	30	2.20833	4.54475	18.179	9.73875	16	15.5	31.5	5.68	24.26	18.0317	77.0159	9.45	555.375	1405.88	0.756705	1.07263	23.7738	0.317816	20.4549	62.5	26	13.3	8	24.2	33	42.2	1.3296	1.1401	0.6178	0.1327	0.4575	0.3158	0.15175	0.0897	0.1845	22.4183		9	4	5	0.555556
P3.5	3	14	56	30	2.825	5.81385	23.2554	12.4582	16.1	18.5	34.6	9.48	24.15	27.3988	69.7977	13	192	1218	0.916977	10.8915	38.4008	0.529809	13.3923	69.4	16	13.1	10	17.6	24	37.8	1.4511	1.8532	1.1357	0.2168	0.4506	0.3102	0.157	0.091	0.1835	22.9728		8	2	6	0.75
P3.6	3	14	56	30	2.75167	5.66293	22.6517	12.1349	16.6	15	31.6	6.36	23.97	20.1266	75.8544	10.75	205.875	1173.38	0.588887	13.6439	31.3105	0.281357	20.7356	64.4	23	16.4	16	19.3	35	50.5	1.112	0.9757	0.3977	0.1396	0.3262	0.3163	0.1782	0.09955	0.1814	15.4205		9	6	3	0.333333
P4.1	4	14	26	60	2.76667	5.6938	10.5742	24.402	17.3	10.7	28	2.65	24.08	9.46429	86	9.2	203.25	1031.25	0.406674	8.1304	20.3306	0.166284	35.7047	68.2	21	3.8	7	28	28	0	0.9816	0.4042	0.2863	0.0602	0.4188	0.2903	0.1523	0.07895	0.1081	4.75169		8	4	4	0.5
P4.2	4	14	26	60	2.58333	5.3165	9.8735	22.785	18.8	10	28.8	3.5	24.16	12.1528	83.8889	10.35	126.375	1044.38	0.543101	25.2763	41.5694	0.249826	20.243	63.2	25	1.3	5	35.5	30	0	1.0694	0.6048	0.3781	0.0618	0.412	0.2933	0.15095	0.09485	0.13045	9.31537		8	6	2	0.25
P4.3	4	14	26	60	2.85833	5.88245	10.9245	25.2105	16.3	13.6	29.9	4.58	24.11	15.3177	80.6355	10.6	171	1107	0.421386	13.2503	25.8919	0.19852	27.948	56.6	22	7.7	9	35.8	29	0	1.1329	0.7609	0.3333	0.0684	0.2722	0.2175	0.15285	0.10405	0.13865	13.1258		5	1	4	0.8
P4.4	4	14	26	60	2.675	5.50515	10.2239	23.5935	16.5	9.9	26.4	3.15	22.27	11.9318	84.3561	7.75	407.625	1105.12	0.468713	12.2152	26.2766	0.161446	30.7897	54	15	17	17	29.1	31	36.5	1.0287	0.6068	0.4333	0.0673	0.3454	0.2711	0.1342	0.1072	0.1103	21.8213		7	1	6	0.857143
P4.5	4	14	26	60	2.41667	4.9735	9.2365	21.315	17.2	13	30.2	4.74	24.24	15.6954	80.2649	11.65	277.875	1087.88	0.493539	21.5989	36.4051	0.255544	20.9559	43.8	24	29.1	13	27.1	38	50	1.2621	0.8669	0.3905	0.0675	0.4146	0.3049	0.1714	0.10265	0.17025	13.5327		3	1	2	0.666667
P4.6	4	14	26	60	2.55833	5.26505	9.77795	22.5645	16.3	9.9	26.2	2.83	22.21	10.8015	84.771	11.55	233.625	1241.62	0.514148	12.5984	28.0228	0.263929	21.9996	66.3	14	13.7	10	20	23	35	1.0042	0.52	0.2567	0.084	0.2715	0.2537	0.1482	0.1017	0.1413	15.1535		8	5	3	0.375
P5.1	5	21	64	15	3.49167	10.7788	32.8496	7.69913	16.4	18.2	34.6	6.82	26.97	19.711	77.948	9.5	582	1437	1.19751			0.505615		64.9	22	12.3	14	22.9	33	48.9	1.0111	1.1229	0.6238	0.2177	0.4069	0.2985	0.21785	0.0833	0.1546	15.7907		8	4	4	0.5
P5.2	5	21	64	15	3.15833	9.74978	29.7136	6.96413	17.2	15.9	33.1	7.81	24.24	23.5952	73.2326	12.3	203.25	1121.25	1.23263	11.5555	48.5344	0.673838	11.0092	66.6	21	10.1	5	23.3	24	36.3	1.3399	1.5003	0.9972	0.1568	0.384	0.2728	0.15665	0.10285	0.15395	27.6912		0	0	0
P5.3	5	21	64	15	3.11333	9.61086	29.2902	6.8649	17.5	21.5	39	10.36	27.22	26.5641	69.7949	12.05	369.375	1453.88	2.5883	8.73815	78.1499	1.38618	5.31216	59.9	18	17.2	10	22.9	28	39.4	1.8997	2.2591	1.4129	0.2698	0.4245	0.3184	0.1633	0.112	0.20835	94.0333		8	5	3	0.375
P5.4	5	21	64	15	2.75833	8.51498	25.9504	6.08212	17.9	13.5	31.4	6.75	23.92	21.4968	76.1783	9.9	372.75	1263.75	1.13416	27.7854	61.8103	0.499033	10.6778	58.4	20	21	14	20.5	31	48	1.3535	0.8725	0.6848	0.1154	0.4166	0.2859	0.15835	0.0942	0.15555	10.3821		0	0	0
P5.5	5	21	64	15	3.2	9.8784	30.1056	7.056	17.8	13.2	31	5.28	24.55	17.0323	79.1935	12.5	336	1254	0.737497	14.9803	37.1052	0.409721	15.2686	57.2	16	24.8	12	16.7	26	41.1	1.3495	1.2668	0.4903	0.143	0.2981	0.2249	0.17395	0.1086	0.18435	27.4863		0	0	0
P5.6	5	21	64	15	2.81833	8.7002	26.5149	6.21443	18.6	14.7	33.3	6.37	25.92	19.1291	77.8378	10.15	454.875	1368.38	0.92707	19.4482	47.2602	0.418212	12.8192	51.7	15	17.5	14	31.2	27	34	1.4894	1.441	0.8125	0.1878	0.4564	0.3104	0.18125	0.1117	0.1815	51.8493		9	7	2	0.222222
P6.1	6	21	34	45	2.33333	7.203	11.662	15.435	16.2	13	29.2	3.5	24.52	11.9863	83.9726	9.75	457.125	1334.62	0.532711	6.60718	22.5885	0.230841	25.2713	47.7	19	31.2	13	22.8	30	40.4	1.3977	0.999	0.4883	0.1022	0.4624	0.3105	0.17695	0.1124	0.1426	15.4718		8	6	2	0.25
P6.2	6	21	34	45	2.34167	7.22872	11.7036	15.4901	16.2	13.9	30.1	3.86	24.71	12.8239	82.093	11.65	289.125	1252.12	0.550318	19.6105	36.12	0.284943	18.5709	58.4	14	20.2	19	23.3	27	37.6	1.2468	0.7282	0.3683	0.0866	0.375	0.3075	0.1686	0.0986	0.16645	12.3919		9	5	4	0.444444
P6.3	6	21	34	45	2.35	7.25445	11.7453	15.5452	16.9	11.6	28.5	3.56	23.91	12.4912	83.8947	8.7	573.75	1356.75	0.424036	4.44461	17.1657	0.163961	34.116	57.7	14	4	10	39.8	19	23.7	1.2166	0.7176	0.4392	0.1023	0.4147	0.286	0.16765	0.0884	0.13795	12.1829		5	2	3	0.6
P6.4	6	21	34	45	2.4	7.4088	11.9952	15.876	17.7	13.2	30.9	4.62	25.19	14.9515	81.521	10.5	402.75	1347.75	0.850091	20.664	46.1667	0.396709	13.4185	73.9	13	10.1	8	16	20	39.8	1.3076	1.0045	0.5344	0.1007	0.4598	0.3134	0.17295	0.09315	0.15955	12.1639		0	0	0
P6.5	6	21	34	45	2.39167	7.38307	11.9535	15.8209	17	13.5	30.5	5.18	24.18	16.9836	79.2787	10.2	529.5	1447.5	1.27497	21.9706	60.2199	0.577988	9.39226	62.6	15	13.7	14	23.7	27	48.1	0.9116	1.206	0.4386	0.1223	0.3536	0.3359	0.21015	0.08385	0.13375	9.95894		6	2	4	0.666667
P6.6	6	21	34	45	2.36	7.28532	11.7953	15.6114	14.9	15.5	30.4	4.98	24.33	16.3816	80.0329	9.65	351.375	1219.88	0.45001	1.27216	14.7725	0.193004	35.7472	75.9	20	6.4	9	17.7	28	43.4	1.2078	0.7529	0.3619	0.1144	0.3461	0.2515	0.17475	0.08825	0.1568	14.0512		8	6	2	0.25
P7.1	7	30	40	30	2.55	11.2455	14.994	11.2455	14.1	21.7	35.8	7.14	27.53	19.9441	76.8994	8.15	548.625	1282.12	2.69625	33.4179	114.305	0.97664	5.57241	68.3	23	7.1	8	24.6	30	0	1.2279	1.5004	0.6595	0.2366	0.3019	0.3373	0.2534	0.10155	0.1823	19.23		11	3	8	0.727273
P7.2	7	30	40	30	2.75	12.1275	16.17	12.1275	16.9	18.4	35.3	10.12	23.85	28.6686	67.5637	11.55	190.125	1229.62	1.03438	5.63341	36.6649	0.530984	13.6256	55.8	26	11.9	13	32.2	38	0	1.5788	1.9886	1.5948	0.2751	0.436	0.3115	0.18155	0.0971	0.1643	29.7863		7	3	4	0.571429
P7.3	7	30	40	30	2.84667	12.5538	16.7384	12.5538	16.2	17.7	33.9	9.23	23.16	27.2271	68.3186	12.55	340.125	1393.12	1.71051			0.954084		51.3	23	15.5	9	33.2	30	0	1.4774	1.9565	1.4629	0.1827	0.3589	0.2973	0.1605	0.0964	0.1539	21.018		9	3	6	0.666667
P7.4	7	30	40	30	2.4	10.584	14.112	10.584	17.9	19	36.9	10.17	25.34	27.561	68.6721	11.35	748.875	1770.38	1.47048	9.74669	53.8612	0.741777	7.92687	63	18	17.2	15	19.8	31	41.1	1.818	2.561	1.7162	0.2641	0.4289	0.3059	0.194	0.10195	0.16675	61.2671		7	6	1	0.142857
P7.5	7	30	40	30	2.66667	11.76	15.68	11.76	17.6	14.6	32.2	6.61	24.35	20.528	75.6211	11.15	593.625	1597.12	1.10416	12.3062	34.2578	0.54717	12.1842	60.2	20	18.8	14	20	32	38.8	1.4837	1.4951	1.0006	0.1703	0.431	0.3086	0.17215	0.1049	0.1611	25.2669		7	2	5	0.714286
P7.6	7	30	40	30	2.56833	11.3263	15.1018	11.3263	16.1	14.6	30.7	5.6	23.75	18.241	77.3616	10.55	512.625	1462.12	1.2149	6.43236	37.6634	0.569651	11.9029	51.7	17	21.2	13	28.7	30	43	1.1935	1.2236	0.4688	0.1639	0.3212	0.2423	0.17715	0.10635	0.1666	30.3107		2	2	0	0
P8.1	8	35	20	45	2.50833	12.9054	7.3745	16.5926	16	13.5	29.5	4.05	24.16	13.7288	81.8983	8.8	626.25	1418.25	0.66985	9.0365	29.132	0.261986	20.2632	45.7	19	30.7	17	23.6	35	51.8	1.2945	0.6995	0.3599	0.0883	0.4052	0.2995	0.178	0.09245	0.16025	5.94818		9	3	6	0.666667
P8.2	8	35	20	45	2.20833	11.3619	6.4925	14.6081	13.7	13.8	27.5	2.27	23.93	8.25455	87.0182	10.85	567.375	1543.88	0.598436	4.53632	22.4894	0.288579	21.0611	57.8	21	13.5	12	28.8	32	43.1	1.205	0.5081	0.2669	0.0599	0.2809	0.2825	0.18355	0.0938	0.1564	6.17398		5	3	2	0.4
P8.3	8	35	20	45	2.25833	11.6191	6.6395	14.9389	19.3	12.4	31.7	7.35	23.23	23.1861	73.2808	10.45	413.625	1354.12	1.17991	5.41463	40.812	0.548003	12.1142	75.6	16	11.5	10	12.8	24	37.4	1.301	1.3985	0.5431	0.1302	0.349	0.2276	0.18945	0.10565	0.1819	9.45528		8	6	2	0.25
P8.4	8	35	20	45	2.79167	14.3631	8.2075	18.4669	15.8	15.4	31.2	3.38	26.2	10.8333	83.9744	6.5	575.25	1160.25	1.39734	6.26922	48.1895	0.403676	14.0327	60.2	20	18.2	13	21.6	33	49.2	1.1263	1.0179	0.6965	0.0674	0.4922	0.3281	0.2147	0.10355	0.15365	19.3958		11	3	8	0.727273
P8.5	8	35	20	45	2.75	14.1487	8.085	18.1913	15.8	16.2	32	2.36	27.87	7.375	87.0938	10.4	405.75	1323.75	1.91254	7.40535	64.7814	0.884017	7.65685	58.1	20	12.9	15	29.1	35	49.5	1.2959	0.9216	0.5368	0.1021	0.4991	0.332	0.2279	0.10415	0.16135	10.6197		7	4	3	0.428571
P8.6	8	35	20	45	2.87167	14.7747	8.4427	18.9961	15.7	13.7	29.4	2.02	25.96	6.87075	88.2993	9.4	244.5	1090.5	0.386932	2.45686	14.0648	0.161651	42.3389	58.7	23	13.2	13	28.2	35	50.6	1.2524	0.6456	0.3207	0.0837	0.3515	0.2544	0.18165	0.1057	0.14175	9.8262		8	5	3	0.375
P9.1	9	42	43	15	3	18.522	18.963	6.615	17.1	11.2	28.3	2.62	24.49	9.25795	86.5371	8.65	530.625	1309.12	0.63981	9.10017	28.2945	0.245972	22.0864	60.6	24	18.6	13	20.8	34	49.3	1.2891	0.5573	0.4219	0.0664	0.4362	0.309	0.20045	0.1059	0.14595	6.17093		7	5	2	0.285714
P9.2	9	42	43	15	2.93333	18.1104	18.5416	6.468	15.2	12.2	27.4	1.37	24.28	5	88.6131	12.9	507	1398	0.431948	6.82793	19.7864	0.24765	25.4714	56.1	15	17	12	26.9	26	34.8	1.2354	0.361	0.3423	0.0811	0.3826	0.2926	0.16745	0.10485	0.1207	5.72277		0	0	0
P9.3	9	42	43	15	2.80167	17.2975	17.7093	6.17767	16.5	15.6	32.1	5.8	25.06	18.0685	78.0685	9.6	481.5	1345.5	1.12903	8.52745	35.2582	0.481717	13.9457	64.1	21	21.6	10	14.4	30	48.2	1.3861	0.9954	0.7793	0.1364	0.4059	0.274	0.1858	0.08955	0.1376	10.4803		4	1	3	0.75
P9.4	9	42	43	15	2.85833	17.6473	18.0675	6.30262	15.2	10.9	26.1	2.28	22.6	8.73563	86.59	8.45	451.875	1212.38	0.557527	12.0536	28.7794	0.209382	24.6649	61.6	15	18.6	14	19.9	30	45.3	1.3086	0.748	0.4876	0.085	0.4414	0.2794	0.15945	0.0899	0.147	7.55304		0	0	0
P9.5	9	42	43	15	2.85	17.5959	18.0148	6.28425	17.2	12.7	29.9	4.2	24.26	14.0468	81.1371	12.3	427.5	1345.5	0.980974	12.7934	42.2226	0.536266	12.0783	62.8	17	20.4	15	16.8	30	44.6	1.3992	0.6848	0.5473	0.0827	0.4394	0.3157	0.18535	0.087	0.17415	8.32561		0	0	0
P9.6	9	42	43	15	2.96167	18.2853	18.7207	6.53048	17.4	16	33.4	7.02	24.84	21.018	74.3713	10.8	441	1413	0.959934	13.95	42.7481	0.460768	12.6368	63.5	18	21.7	16	14.8	33	41.7	1.567	1.4378	0.5461	0.1665	0.3316	0.2744	0.19125	0.09985	0.2079	19.9716		8	4	4	0.5
P10.1	10	50	20	30	2.68333	19.7225	7.889	11.8335	16.2	14.9	31.1	5.96	23.65	19.164	76.045	10.1	524.25	1433.25	0.758664	17.6273	40.3872	0.340556	15.0152	61.1	20	18.3	13	20.6	31	48.7	1.316	1.253	0.5723	0.0987	0.3617	0.2867	0.187	0.10255	0.1749	13.3326		10	5	5	0.5
P10.2	10	50	20	30	2.86667	21.07	8.428	12.642	16	15.1	31.1	4.92	24.31	15.8199	78.1672	11.6	516.75	1560.75	0.843356	14.6447	39.9454	0.434797	12.8046	57.1	25	22.4	18	20.6	41	61.5	1.5857	1.4133	0.9586	0.132	0.4456	0.2808	0.18255	0.0962	0.17305	10.7063		0	0	0
P10.3	10	50	20	30	2.51667	18.4975	7.399	11.0985	17.8	10.1	27.9	3.29	22.88	11.7921	82.0072	9.95	659.625	1555.12	0.398063	8.30085	20.2427	0.176032	28.3201	38.4	14	26.4	16	35.1	29	40.5	1.3671	0.7017	0.4507	0.075	0.4604	0.3233	0.1917	0.11045	0.18615	10.0819		6	3	3	0.5
P10.4	10	50	20	30	3.265	23.9977	9.5991	14.3986	18.1	14.2	32.3	2.62	27.89	8.11146	86.3467	10.75	203.625	1171.12	0.547078	17.4216	33.8339	0.261382	20.7154	63.1	17	24.5	14	12.5	30	46.2	1.4433	0.9582	0.5242	0.0845	0.5113	0.3055	0.20725	0.10865	0.23825	10.8831		8	4	4	0.5
P10.5	10	50	20	30	3.15	23.1525	9.261	13.8915	16.7	14.5	31.2	2.77	26.75	8.87821	85.7372	11.35	428.625	1328.62	0.864047	11.6277	29.1188	0.435864	16.2347	53.6	18	21.2	13	25.2	29	40.5	1.58	1.294	0.6301	0.1256	0.4504	0.3237	0.23115	0.10225	0.13945	12.6524		7	3	4	0.571429
P10.6	10	50	20	30	2.87833	21.1558	8.4623	12.6935	16.6	12.4	29	1.95	25.66	6.72414	88.4828	10.1	558	1467	0.29417	6.9452	15.7703	0.13205	38.1421	70.8	21	11.7	10	17.5	31	48.4	1.4639	0.6323	0.2817	0.0802	0.323	0.3172	0.208	0.1081	0.1665	7.94659		2	0	2	1

## Sheet: Supp Data 4
Supplementary Table 4. Raw data F1 female offspring
PatID	Diet	p_P	p_C	p_F	pat_food_intake	pat_eaten.P	pat_eaten.C	pat_eaten.F	sex	litter	wean	growth	weight	fat	lean	perc.fat	perc.lean	basal.glucose	glucose.iAUC	glucose.AUC	basal.insulin	insulin.iAUC	insulin.AUC	HOMA	Matsuda	closed.perc	closed.bout	open.perc	open.bout	centre.perc	centre.bout	fast	liver	gWAT	sWAT	BAT	quad	gastroc	kidney	uterus	liver.trig
P1.1	1	7	33	60	3.43333	3.5329	16.6551	30.282	f	7	8.25	13.45	22.25	1.8	19.405	8.09124	87.2127	7.425	310.312	978.562	0.733275	12.4254	25.3282	0.243665	36.9359	51.85	22.5	19.4	17	28.85	38	56.05	0.73535	0.23815	0.29265	0.04025	0.20545	0.25235	0.1324	0.0939	9.70679
P1.2	1	7	33	60	3.20833	3.30138	15.5636	28.2975	f	3	10.7
P1.3	1	7	33	60	3.64	3.74556	17.6576	32.1048	f	9	9.86667	12.6667	23.1	2.59	19.08	11.2666	82.5675	8.775	294.562	1041.56	0.525152	11.9885	26.6335	0.204812	28.9213	53.8	22	19.1	19	27.15	40	50.1	1.0055	0.33415	0.41435	0.0371	0.12625	0.2435	0.13015	0.0774	12.7879
P1.4	1	7	33	60	3.80833	3.91878	18.4742	33.5895	f	6	8.7	16.2	27.5	6.81	19.6	24.7636	71.2727	9.9	183	1074	0.449627	18.8166	32.3054	0.197836	25.4458	60.7	20	14.9	7	24.5	27	45.5		0.7439	0.6633	0.0465	0.1857	0.2353	0.11915	0.0485	45.805
P1.5	1	7	33	60	3.45	3.55005	16.7359	30.429	f	9	8.825	12.75	22.5	2.55	18.845	11.061	83.9978	8.975	268.312	1040.06	1.09093	7.08694	17.5987	0.427753	42.3405	54.2	17.5	24.85	12	20.9	28.5	51.15	0.822	0.2003	0.2785	0.03195	0.17085	0.24145	0.123425	0.0741	12.4662
P1.6	1	7	33	60	3.615	3.71983	17.5364	31.8843	f	10	9.2	11.075	21.6	2.48	18.235	11.4705	84.4377	8.6	337.5	1075.5	0.418584	3.51619	15.3343	0.166265	44.8821	55.4	21.5	21.8	15	22.85	35	53.55	0.9226	0.26515	0.36865	0.0452	0.15745	0.2267	0.120125	0.0517	21.8015
P2.1	2	7	78	15	3.50833	3.61008	40.2266	7.73588	f	7	8.66667	14.7333	22.95	2.785	18.86	12.1153	82.2203	9.725	352.688	1036.69	0.44796	4.45471	16.4525	0.193618	36.6916	56.2	17	17.2	12.5	26.6	28.5	41.35	0.9797	0.3125	0.1971	0.04915	0.1341	0.24445	0.12445	0.0675	18.2978
P2.2	2	7	78	15	3.80833	3.91878	43.6664	8.39738	f	7	8.55	13.25	21.85	2.055	18.545	9.37204	84.8878	10.05	265.5	1048.5	0.325496	6.87941	16.6443	0.145388	41.9039	54.4	21.5	22	16	23.65	37.5	54.95	1.1401	0.2924	0.28695	0.04845	0.15195	0.2374	0.120075	0.05525	15.79
P2.3	2	7	78	15	3.22	3.31338	36.9205	7.1001	f	6	9.75	14.2	26	3.855	21.075	14.7678	81.1235	8.725	254.812	1040.06	0.709545	9.3473	27.7505	0.273496	23.895	61.6	21	14.15	10	24.25	31	49.25	1.27495	0.74965	0.4802	0.07665	0.4031	0.2473	0.1454	0.071	21.639
P2.4	2	7	78	15	3.60833	3.71298	41.3732	7.95638	f	8	8.05	14.5	23.6	2.895	19.39	12.2999	82.1288	8.75	290.625	1053.38	0.584188	6.11696	20.1005	0.227747	30.5719	52.7	22.5	18.75	11.5	28.55	33	46.1	0.91	0.2433	0.29815	0.0354	0.1363	0.23495	0.131725	0.05535	18.7168
P2.5	2	7	78	15	3.38333	3.48145	38.7933	7.46025	f	5	9.25	14.45	25.25	4.145	19.81	16.314	78.5442	8.525	378.562	1145.81	0.472236	7.39048	21.5576	0.179418	32.1994	53.25	23	19.4	14.5	27.4	37.5	36.75	1.0659	1.0142	0.37175	0.07785	0.37545	0.23695	0.128275	0.0965	17.2235
P2.6	2	7	78	15	3.77667	3.88619	43.3033	8.32755	f	8	8.48333	13.475	21.45	2.045	18.635	9.52912	86.8809	9.325	213.562	956.062	0.344641	13.9998	24.339	0.143979	42.5734	51.3	25.5	25.8	18.5	23.05	43.5	61.55	0.76765	0.2322	0.27195	0.0361	0.17485	0.23565	0.11425	0.0645	15.1528
P3.1	3	14	56	30	2.40833	4.95635	19.8254	10.6207	f	10	9.075	13.1	22.1	1.955	18.95	8.82966	85.7741	9.45	355.125	1115.62	0.502717	4.3502	19.4317	0.209226	31.8351	61	16.5	13.15	13.5	25.8	29	43.3	0.9324	0.1687	0.1583	0.0528	0.1458	0.26205	0.118525	0.05105	14.3206
P3.2	3	14	56	30	2.69167	5.53945	22.1578	11.8703	f	3	9.8	13.3	25.3	4.37	19.91	17.2727	78.6957	8.7	342	1044	0.641924	8.45215	27.7099	0.248211	24.8789	52.9	16	26.5	16	20.6	32	55.1	0.8994	0.4561	0.273	0.0736	0.2216	0.2733	0.161	0.0534
P3.3	3	14	56	30	2.99833	6.17057	24.6823	13.2226	f	10	7.75	12.35	22.55	3.24	18.175	14.3308	80.6207	10.8	425.625	1397.62	0.495325	4.38802	19.2478	0.238847	26.7495	49.5	27	18.7	17	31.9	42	57.9	0.8978	0.27065	0.3334	0.03775	0.17605	0.224	0.0979	0.0522	20.7361
P3.4	3	14	56	30	2.20833	4.54475	18.179	9.73875	f	9	9.45	13.25	26.05	4.515	20.265	17.386	77.727	9.85	350.625	1237.12	0.817312	12.5816	37.101	0.353319	16.9662	53	21.5	21.05	13.5	25.9	34.5	52.65	0.94415	0.4988	0.37295	0.05335	0.38115	0.23795	0.131925	0.0885	18.4923
P3.5	3	14	56	30	2.825	5.81385	23.2554	12.4582	f	8	7.28	14.1	22.05	2.205	18.69	9.99434	84.7603	9.075	443.438	1260.19	0.389661	5.05417	16.744	0.154728	37.0413	58.6	19.5	24	10.5	17.35	29	49.45	0.95825	0.2315	0.28305	0.0718	0.2802	0.2037	0.11615	0.083	17.0596
P3.6	3	14	56	30	2.75167	5.66293	22.6517	12.1349	f	9	9.8	13.175	25	4.565	19.155	18.2511	76.6283	9	342.75	1152.75	0.658971	11.5787	31.3479	0.262905	21.9232	60.55	16.5	13.6	11.5	25.85	27.5	40.8	1.1812	0.77905	0.5777	0.07785	0.3528	0.2376	0.115875	0.07705	30.8031
P4.1	4	14	26	60	2.76667	5.6938	10.5742	24.402	f	8	7.375	14.6	22.75	2.34	19.265	10.2715	84.6981	9.275	426.188	1222.69	0.509063	9.38795	24.6598	0.210463	26.6562	56.75	21.5	20.55	12.5	22.6	33	48.7	1.1001	0.3613	0.3175	0.04965	0.36775	0.24585	0.12595	0.078	22.8608
P4.2	4	14	26	60	2.58333	5.3165	9.8735	22.785	f	8	8.31667	13.75	22.25	2.155	18.89	9.6377	84.8978	7.975	269.062	962.062	1.33766	5.62366	20.8785	0.441882	32.8443	46.7	24	32.8	15	20.5	38	61.3	0.9462	0.27785	0.2848	0.0631	0.33895	0.24985	0.1256	0.0895	18.2892
P4.3	4	14	26	60	2.85833	5.88245	10.9245	25.2105	f	5	10.1	14	23.9	3.46	19.26	14.477	80.5858	8.75	349.125	1087.12	0.906231			0.352423		58.2	18	18.8	16	23.1	34	51	0.9572	0.5119	0.5214	0.0473	0.1578	0.2459	0.16615	0.0573	16.8486
P4.4	4	14	26	60	2.675	5.50515	10.2239	23.5935	f	7	9.8	12.7	22.2	2.13	18.94	9.59459	85.3153	10.35	236.625	992.625	0.690545	6.86432	27.5807	0.317651	22.6068	52.6	22	17.7	12	29.8	32	47.9	1.0005	0.407	0.3576	0.0367	0.2053	0.2501	0.12335	0.0862	51.1168
P4.5	4	14	26	60	2.41667	4.9735	9.2365	21.315	f	3	12.8	15.1	27.9	4.99	21.88	17.8853	78.4229	7.45	355.125	1025.62	1.38888			0.459874		52.3	23	26.1	12	21.6	34	56.3	0.9305	0.6352	0.5149	0.0561	0.1936	0.2871	0.16985	0.0566	26.993
P4.6	4	14	26	60	2.55833	5.26505	9.77795	22.5645	f	8	8.74	14.175	23.6	3.18	19.18	13.4746	81.2712	8.675	344.062	1124.81	0.338426	12.0985	22.2513	0.130283	37.6193	49.4	14.5	20.55	11.5	30.05	25.5	42.95	1.074	0.3578	0.38655	0.04875	0.16055	0.25715	0.115125	0.0809	28.0898
P5.1	5	21	64	15	3.49167	10.7788	32.8496	7.69913	f	8	9.45	13.45	23.85	2.555	20.065	10.7022	84.1391	7.725	359.438	1045.69	1.00179	14.961	43.5658	0.344078	17.6243	45.8	23	27.3	16	27	38.5	61.05	0.8511	0.24695	0.2645	0.05875	0.38255	0.24745	0.140675	0.06245	8.73471
P5.2	5	21	64	15	3.15833	9.74978	29.7136	6.96413	f	0
P5.3	5	21	64	15	3.11333	9.61086	29.2902	6.8649	f	8	7.56	11.875	20.2	1.675	17.335	8.27883	85.8317	8.575	294.188	1041.19	0.507399	3.26196	18.4242	0.194079	35.0648	64.75	16	11.8	12	23.4	25	37.75	1.03295	0.1936	0.1782	0.05405	0.30645	0.2489	0.115225	0.0895	14.6454
P5.4	5	21	64	15	2.75833	8.51498	25.9504	6.08212	f	0
P5.5	5	21	64	15	3.2	9.8784	30.1056	7.056	f	0
P5.6	5	21	64	15	2.81833	8.7002	26.5149	6.21443	f	9	8.18333	13.775	21.85	1.82	18.765	8.34999	85.8624	8.775	476.438	1239.19	0.323347	7.77314	17.4735	0.126279	40.4761	43.2	21	28.95	16	27.85	36.5	53.6	1.009	0.228	0.2138	0.0885	0.32645	0.22785	0.1311	0.06095	15.9718
P6.1	6	21	34	45	2.33333	7.203	11.662	15.435	f	8	7.43333	14.35	22.5	2.255	18.945	10.0279	84.2028	9.4	300.375	1067.62	0.4616	8.69891	22.5469	0.196144	32.0164	53.9	20	21.35	18	24.7	37	46.6	1.25485	0.37365	0.30375	0.05105	0.36555	0.2286	0.108325	0.08315	24.9994
P6.2	6	21	34	45	2.34167	7.22872	11.7036	15.4901	f	9	7.92	11.875	21.25	2.295	17.715	10.7701	83.4054	9.5	188.625	1014.38	0.389982	16.0402	27.7397	0.166707	31.9658	38.6	21.5	32.8	21	28.6	41.5	55.95	0.90115	0.1843	0.2716	0.03805	0.1659	0.24435	0.1086	0.05055	9.1426
P6.3	6	21	34	45	2.35	7.25445	11.7453	15.5452	f	5	11.3	12.4	23.75	2.945	19.75	12.3995	83.166	9.775	245.438	1116.19	0.7874	4.6164	28.2384	0.34734	22.5238	57.35	22.5	13.55	13.5	29.1	35.5	49.7	0.9971	0.48755	0.42875	0.0431	0.1413	0.2641	0.1416	0.0777	16.3179
P6.4	6	21	34	45	2.4	7.4088	11.9952	15.876	f	0
P6.5	6	21	34	45	2.39167	7.38307	11.9535	15.8209	f	6	9.9	13.05	23.8	3.23	19.26	13.5147	80.9495	9.3	447	1180.5	0.565507	5.26254	22.2277	0.233937	26.9725	49.7	16.5	27.3	14.5	23.1	29.5	54.4	1.1545	0.323	0.31145	0.0356	0.1639	0.2275	0.121575	0.08475	10.7875
P6.6	6	21	34	45	2.36	7.28532	11.7953	15.6114	f	8	8.73333	12.325	20.9	2.13	17.39	10.196	83.2033	10.075	363.562	1101.56	0.328204	9.45847	19.3046	0.144893	38.2333	54.4	18	19.2	14	26.4	32	47.2	0.95425	0.1648	0.2775	0.03245	0.13645	0.2276	0.105925	0.04685	12.2768
P7.1	7	30	40	30	2.55	11.2455	14.994	11.2455	f	11	9.36667	11.9333	21.25	2.095	18.16	9.85849	85.4603	9.3	199.875	1016.62	0.320826	6.7285	16.3533	0.133021	45.8742	53.5	18.5	18.3	10	28.2	28	48.75	0.9958	0.20075	0.1812	0.0437	0.12335	0.23275	0.11155	0.0708	16.2408
P7.2	7	30	40	30	2.75	12.1275	16.17	12.1275	f	7	9.5	12.2	23.15	3.325	18.555	14.3689	80.1466	8.975	252.562	1060.31	0.476415	2.14062	15.8093	0.192331	38.2716	60.5	21	17.3	10	22.25	29	49.7	1.08335	0.3971	0.26535	0.09	0.31615	0.1824	0.132525	0.08325	19.4468
P7.3	7	30	40	30	2.84667	12.5538	16.7384	12.5538	f	9	8.43333	13.0333	22.35	2.225	18.85	9.93882	84.3532	9.425	431.438	1279.69	0.51702	6.23206	21.7427	0.215613	27.5398	52.6	18.5	18.75	12	28.6	30.5	47.1	1.1271	0.37335	0.34025	0.0938	0.3402	0.15525	0.12705	0.05125	25.298
P7.4	7	30	40	30	2.4	10.584	14.112	10.584	f	7	8.73333	11.725	21.5	2.16	18.18	10.0323	84.5643	9.6	448.875	1238.62	0.540153	6.23702	22.2573	0.229519	27.5458	46.2	19.5	31.05	16.5	22.8	36	55.95	1.01535	0.3274	0.2677	0.057	0.27395	0.19875	0.1119	0.0852	14.33
P7.5	7	30	40	30	2.66667	11.76	15.68	11.76	f	7	9.2	12.1	23.05	2.22	19.61	9.59148	85.1213	8.95	357	1162.5	0.868405	12.53	32.118	0.343038	20.7894	46.15	20.5	25.4	17	28.35	34.5	54.75	1.00605	0.2871	0.3319	0.0884	0.3288	0.23875	0.1522	0.0905	19.0939
P7.6	7	30	40	30	2.56833	11.3263	15.1018	11.3263	f	2	10.4	12.9	23.65	3.035	19.565	12.7311	82.783	8.875	254.062	1016.81	0.689528	9.13818	29.824	0.27162	23.6329	61.3	19.5	15	12	23.75	30	45.4	1.043	0.3846	0.4041	0.0527	0.1514	0.2386	0.15195	0.0723	22.4462
P8.1	8	35	20	45	2.50833	12.9054	7.3745	16.5926	f	9	9.36667	13.1	22.8	2.82	18.88	12.3551	82.8203	9.975	504.938	1400.44	0.423255	5.88044	18.5781	0.188864	30.3592	40.7	15	26.45	15	32.9	29	39.85	1.04055	0.4401	0.4226	0.11875	0.37535	0.2125	0.1402	0.0765	23.3417
P8.2	8	35	20	45	2.20833	11.3619	6.4925	14.6081	f	5	10.6667	13.7333	24.8	2.985	20.64	11.9593	83.2988	8.75	391.5	1093.5	0.483187	9.34259	23.8382	0.189039	30.4188	67.45	22	10.05	6	22.55	27.5	44.55	1.05515	0.36415	0.33325	0.04115	0.173	0.2183	0.139875	0.0595	10.638
P8.3	8	35	20	45	2.25833	11.6191	6.6395	14.9389	f	8	8.58333	13.05	22.1	2.13	19.06	9.66533	86.2465	9.225	372.188	1202.44	0.379656	4.50869	15.5366	0.154496	41.7148	57.2	23.5	17.95	19.5	24.85	42.5	56.1	0.85785	0.29995	0.35225	0.03545	0.1485	0.22865	0.125175	0.05425	11.285
P8.4	8	35	20	45	2.79167	14.3631	8.2075	18.4669	f	11	8.1	13.8	23.4	2.775	19.55	11.87	83.5377	8	321.75	1041.75	0.794165	10.9703	34.7952	0.28329	21.1966	54.15	21.5	28	18.5	17.9	39	59.55	0.8141	0.29715	0.2855	0.0736	0.34375	0.2793	0.14865	0.056	7.32529
P8.5	8	35	20	45	2.75	14.1487	8.085	18.1913	f	7	8.825	12.45	23.1	2.84	19.145	12.2831	82.8905	9.875	295.312	1132.31	0.419528	3.41027	12.7653	0.178981	44.4169	54.15	20.5	20.4	15.5	25.45	34	47.75	1.02545	0.3408	0.33835	0.0783	0.32505	0.23605	0.123675	0.0855	17.0921
P8.6	8	35	20	45	2.87167	14.7747	8.4427	18.9961	f	8	8.9	13.5	24.95	3.37	20.325	13.5078	81.4565	9.175	368.438	1151.44	0.489754	6.64547	21.3381	0.199392	30.2736	50.45	23.5	27.75	13.5	21.8	36.5	52.95	1.02295	0.41515	0.31525	0.0633	0.3925	0.2315	0.13335	0.06	17.895
P9.1	9	42	43	15	3	18.522	18.963	6.615	f	7	4.54		20.7	2.065	17.505	9.97585	84.5652	8.575	458.812	1172.06	0.564493	5.10258	22.0374	0.216085	28.6267	46.35	20.5	25.65	19	28.05	38.5	52.05	0.92935	0.21885	0.2407	0.04535	0.3145	0.22395	0.102525	0.0835	14.6628
P9.2	9	42	43	15	2.93333	18.1104	18.5416	6.468	f	0
P9.3	9	42	43	15	2.80167	17.2975	17.7093	6.17767	f	4			23.9	3.01	20.07	12.5941	83.9749	9.05	181.125	946.125	0.726257	7.6889	29.4766	0.292117	23.357	57.2	24	19.4	13	23.4	35	58.3	1.1443	0.4278	0.2996	0.0464	0.3375	0.27	0.14765	0.048	18.2086
P9.4	9	42	43	15	2.85833	17.6473	18.0675	6.30262	f	0
P9.5	9	42	43	15	2.85	17.5959	18.0148	6.28425	f	0
P9.6	9	42	43	15	2.96167	18.2853	18.7207	6.53048	f	8	7.925	13.6	22.25	2.435	18.935	10.9535	85.1101	7.6	339.375	1005.38	1.17042			0.390523		45.55	21.5	34.75	18.5	19.7	40	60.3	0.95055	0.17085	0.266	0.04855	0.17285	0.2515	0.13745	0.0616	8.10163
P10.1	10	50	20	30	2.68333	19.7225	7.889	11.8335	f	10	10.25	11.4	22.9	1.615	20.15	7.05782	87.9945	8.125	262.312	993.562	0.291329	6.39372	15.1336	0.105026	53.7944	61.25	23	7.3	8	30.3	30	33	1.0732	0.1928	0.28245	0.03025	0.1489	0.23755	0.1209	0.06665	16.9104
P10.2	10	50	20	30	2.86667	21.07	8.428	12.642	f	0
P10.3	10	50	20	30	2.51667	18.4975	7.399	11.0985	f	6	8.93333	14.2333	25.25	3.725	20.38	14.6848	80.7969	8.1	277.5	984	0.877008	7.6441	26.5881	0.306993	24.6543	67.6	18	14.5	10	17.9	27.5	46.2	0.99865	0.41385	0.30385	0.0611	0.3336	0.28875	0.14745	0.0575	15.2766
P10.4	10	50	20	30	3.265	23.9977	9.5991	14.3986	f	8	8.425	13.075	22.45	1.975	19.02	8.81917	84.703	9.05	155.25	969.75	0.496155	4.69113	19.0348	0.2011	35.5033	48.5	19.5	26.7	17.5	24.75	36.5	55.1	1.0385	0.2295	0.2201	0.05455	0.3538	0.2214	0.1146	0.105	14.6025
P10.5	10	50	20	30	3.15	23.1525	9.261	13.8915	f	7	8.16667	13.05	23.4	2.925	19.29	12.492	82.4153	9.25	340.875	1173.38	0.78095	12.2912	23.6904	0.320166	30.975	57.6	21	18.4	13.5	24	32.5	51.9	0.94665	0.35935	0.38545	0.04145	0.16845	0.25335	0.12825	0.11135	20.1396
P10.6	10	50	20	30	2.87833	21.1558	8.4623	12.6935	f	2

## Sheet: Supp Data 5
Supplementary Table 5. Raw data F1 male offspring
PatID	Diet	p_P	p_C	p_F	pat_food_intake	pat_eaten.P	pat_eaten.C	pat_eaten.F	sex	litter	wean	growth	weight	fat	lean	perc.fat	perc.lean	basal.glucose	glucose.iAUC	glucose.AUC	basal.insulin	insulin.iAUC	insulin.AUC	HOMA	Matsuda	closed.perc	closed.bout	open.perc	open.bout	centre.perc	centre.bout	fast	liver	gWAT	sWAT	BAT	quad	gastroc	kidney	testis	SV	liver.trig
P1.1	1	7	33	60	3.43333	3.5329	16.6551	30.282	m	7	8.8	20.225	29.25	2.29	26.135	7.82761	89.3539	9.175	356.812	1169.06	0.882427	9.9325	35.7274	0.359103	17.2574	54.4	16.5	24.5	12	21.1	29	48.4	1.06855	0.3297	0.1841	0.08225	0.29355	0.32605	0.193925	0.092125	0.1085	9.43146
P1.2	1	7	33	60	3.20833	3.30138	15.5636	28.2975	m	3	11.9	20.45	33.25	3.675	28.4	10.9431	85.4751	10.35	280.5	1191.75	1.05725	10.2088	41.9263	0.48561	13.7546	51.85	25	22.75	15	25.4	39.5	57.7	1.3408	0.7666	0.34775	0.1281	0.325	0.3344	0.2339	0.11345	0.131075	9.68252
P1.3	1	7	33	60	3.64	3.74556	17.6576	32.1048	m	9	9.88	18.55	28.05	2.165	24.885	7.75521	88.6822	10.025	208.688	1000.69	1.0707	23.5627	52.3692	0.480845	13.6432	53.65	23	27.2	18	19.05	39	55.1	1.0981	0.3531	0.1857	0.08385	0.2433	0.3183	0.19295	0.0982	0.10285	8.95259
P1.4	1	7	33	60	3.80833	3.91878	18.4742	33.5895	m	6	8.12	20.7	29.85	3.72	25.2	12.4814	84.4074	10.875	354.938	1333.69	0.841195	10.4771	35.7129	0.406259	15.2242	50.5	22.5	25.05	16	24.55	35.5	50.3	1.3996	0.5659	0.2396	0.0664	0.22065	0.2791	0.161275	0.099775	0.120325	13.2623
P1.5	1	7	33	60	3.45	3.55005	16.7359	30.429	m	9	9.025	21.175	31.55	3.075	27.245	9.74437	86.3575	9.275	316.688	1128.94	0.951653	32.6862	61.2358	0.39346	13.2956	54.75	26.5	26.6	17	18.65	42	58.6	1.18665	0.43825	0.18625	0.1131	0.2745	0.3185	0.198075	0.08075	0.1091	9.60682
P1.6	1	7	33	60	3.615	3.71983	17.5364	31.8843	m	10	10.025	18.85	30.1	2.915	26.065	9.65145	86.6167	10.925	225.562	1085.06	0.538647	11.0595	27.2189	0.261356	24.0948	61.8	24	12.45	10	25.8	31	44	1.46715	0.5332	0.22555	0.0934	0.2947	0.3132	0.17735	0.091125	0.149225	15.4644
P2.1	2	7	78	15	3.50833	3.61008	40.2266	7.73588	m	7	9.325	20.575	30.75	2.775	26.985	9.02698	87.7534	9.575	216.938	1076.44	1.44161	7.78437	45.4308	0.605785	12.2732	57.25	18.5	20.4	12	22.35	30.5	52.35	1.2599	0.32745	0.1978	0.04245	0.26695	0.3033	0.179525	0.10305	0.1195	9.47715
P2.2	2	7	78	15	3.80833	3.91878	43.6664	8.39738	m	7	8.04	20.4	28.3	2.035	25.16	7.18807	88.8867	9.25	373.5	1206	0.575835	11.1497	28.4247	0.23218	25.0564	62.95	18	18.35	10.5	18.8	27	46.9	1.1484	0.37085	0.19165	0.0633	0.30245	0.31785	0.178325	0.09765	0.1328	11.2414
P2.3	2	7	78	15	3.22	3.31338	36.9205	7.1001	m	6	10.425	20.1	32.3	4.66	26.695	14.383	82.701	10.95	273.375	1240.88	1.86391	22.8811	80.5166	0.904962	6.47017	61.65	18.5	14.1	10	24.25	28	40.6	1.5209	0.9021	0.39025	0.1243	0.33	0.3234	0.17225	0.10735	0.12465	17.5043
P2.4	2	7	78	15	3.60833	3.71298	41.3732	7.95638	m	8	9.15	18.525	30.7	3.62	26.065	11.7605	84.9356	9.875	290.062	1178.81	0.723098	51.8674	73.5604	0.318239	13.1269	44.15	26.5	35.65	15	20.2	39.5	55.3	1.50695	0.5329	0.2048	0.0771	0.2753	0.2892	0.16635	0.11025	0.130875	10.8058
P2.5	2	7	78	15	3.38333	3.48145	38.7933	7.46025	m	5	9.1	20.8667	30.7	3.245	26.29	10.5269	85.6576	10.2	330	1248	1.00717	13.6292	43.8443	0.44648	14.1697	52.5	17.5	26.85	13	20.65	30	46.35	1.38005	0.42785	0.24185	0.098	0.3124	0.26745	0.186475	0.09725	0.123	9.6617
P2.6	2	7	78	15	3.77667	3.88619	43.3033	8.32755	m	8	8.55	21.1	32.05	2.415	28.775	7.53441	89.7814	8.725	278.438	1007.44	1.05331	13.8757	45.475	0.408721	15.6137	57.5	17	17.25	14	25.3	29.5	43.15	1.12935	0.3566	0.18475	0.07635	0.3498	0.3156	0.19815	0.093	0.102925	7.3412
P3.1	3	14	56	30	2.40833	4.95635	19.8254	10.6207	m	10	9.575	15.975	27.4	3.245	23.35	11.8451	85.2159	10.475	319.312	1235.06	0.597639	8.27866	25.6816	0.278151	22.4712	52.15	16.5	19.85	16.5	27.95	32	43.35	1.0722	0.44895	0.18055	0.049	0.2309	0.2452	0.147525	0.10495	0.13675	13.2246
P3.2	3	14	56	30	2.69167	5.53945	22.1578	11.8703	m	3	9.9	20.6	30.9	2.995	26.94	9.63552	87.2441	8.625	186.562	915.562	0.855989	33.4522	59.1318	0.322969	16.4567								1.3017	0.4996	0.2259	0.08445	0.30535	0.32115	0.195825	0.083525	0.12075	17.8283
P3.3	3	14	56	30	2.99833	6.17057	24.6823	13.2226	m	10	9.45	20.5	30.7	3.21	26.375	10.473	85.8948	10.825	304.125	1366.12	1.03759	5.67502	36.8027	0.52	9.77815	55.2	21	20.9	14	23.95	35.5	52.3	1.5053	0.49735	0.18675	0.0772	0.27345	0.2957	0.170075	0.1033	0.125975	9.10369
P3.4	3	14	56	30	2.20833	4.54475	18.179	9.73875	m	9	9.85	18.175	29	3.72	24.5	12.8319	84.4794	9.725	355.312	1230.56	1.16828	18.2638	47.8061	0.505086	12.2838	59.75	25	12.35	10.5	27.95	32.5	40.95	1.47235	0.5106	0.26215	0.08165	0.28745	0.30595	0.155625	0.10005	0.114575	15.7891
P3.5	3	14	56	30	2.825	5.81385	23.2554	12.4582	m	8	7.3	19.0333	27.8	2.89	23.885	10.3008	86.0171	11.4	285.75	1199.25	0.912827	21.8169	49.2018	0.459308	13.2468	46.2	19.5	36.8	18	17.05	36.5	50.95	1.31565	0.41065	0.22645	0.0801	0.2392	0.2736	0.14775	0.10525	0.121	18.3567
P3.6	3	14	56	30	2.75167	5.66293	22.6517	12.1349	m	9	10.0333	19.7	31.9	4.725	26.12	14.7265	81.9747	10.4	337.875	1260.38	1.17377	23.0779	58.2911	0.543523	10.663	48.6	19.5	32.45	19.5	19.05	37.5	55.05	1.333	0.76935	0.3847	0.13045	0.30335	0.32765	0.1824	0.106	0.091425	17.7958
P4.1	4	14	26	60	2.76667	5.6938	10.5742	24.402	m	8	7.525	21.175	30.4	3.035	26.44	9.98155	86.9742	11.025	217.688	1209.94	1.38854	51.9213	93.5774	0.678749	7.62252	50.1	18	25.2	14	24.7	31.5	46.05	1.5762	0.4761	0.23895	0.0798	0.2799	0.2997	0.174375	0.087	0.13375	12.0411
P4.2	4	14	26	60	2.58333	5.3165	9.8735	22.785	m	8	8.65	18.75	28.55	2.515	25.235	8.8042	88.3946	10.6	263.25	1206	0.969776	9.9617	37.8932	0.454561	14.6464	48.9	20.5	25.6	17	25.5	37	47.55	1.1869	0.37455	0.21015	0.07205	0.24975	0.2571	0.15895	0.10075	0.1165	11.5506
P4.3	4	14	26	60	2.85833	5.88245	10.9245	25.2105	m	5	10.375	19.15	32.1	3.525	27.45	11.0051	85.4906	11.2	298.125	1108.12	1.0752	14.8568	45.9719	0.537773	12.8883	50.35	20	22.55	17	27.1	36	50.85	1.3255	0.47385	0.2127	0.0883	0.24565	0.2995	0.183425	0.096125	0.1005	8.91846
P4.4	4	14	26	60	2.675	5.50515	10.2239	23.5935	m	7	10.6667	19	29.85	2.24	26.57	7.50752	89.0048	10.35	253.125	1004.62	0.595134	21.7453	39.1709	0.27674	20.6384	50.75	23.5	25.8	18.5	23.45	41.5	54.25	1.2261	0.3911	0.1952	0.08445	0.31895	0.2887	0.18555	0.103425	0.11735	10.5503
P4.5	4	14	26	60	2.41667	4.9735	9.2365	21.315	m	3	13	20.3	33.55	4.39	28.085	13.0828	83.7148	10.575	326.062	1217.06	0.942213	37.3822	65.6486	0.428837	11.8186	56.45	18.5	17.8	11.5	25.75	29.5	47.55	1.384	0.6575	0.2569	0.1273	0.31055	0.32245	0.212525	0.104775	0.117125	16.0449
P4.6	4	14	26	60	2.55833	5.26505	9.77795	22.5645	m	8	8.7	19.5333	29.5	2.695	25.855	9.13955	87.6402	9.15	207	999	0.723321	38.5839	60.2835	0.295882	16.0285	53.4	19.5	22.7	17.5	23.95	36.5	50.1	1.4131	0.40195	0.21195	0.0791	0.2873	0.28805	0.172175	0.1004	0.0999	8.40441
P5.1	5	21	64	15	3.49167	10.7788	32.8496	7.69913	m	8	9.775	18.9	30.25	2.94	26.27	9.74517	86.8156	11.35	276	1203	0.918454	26.5284	51.4569	0.463377	12.5464	49.1	21	20.35	19.5	30.65	39.5	48.7	1.57485	0.44895	0.22095	0.0967	0.3039	0.3294	0.1789	0.08805	0.13075	12.6071
P5.2	5	21	64	15	3.15833	9.74978	29.7136	6.96413	m	0
P5.3	5	21	64	15	3.11333	9.61086	29.2902	6.8649	m	8	7.4	19.9333	28.55	2.885	24.475	9.99902	85.8189	11.85	204.75	1206	1.12156	6.76737	39.4283	0.600197	13.1402	55.6	31	21.2	13	23.3	43	61.6	1.4581	0.4248	0.21015	0.08245	0.26635	0.27175	0.1497	0.092	0.1205	24.8613
P5.4	5	21	64	15	2.75833	8.51498	25.9504	6.08212	m	0
P5.5	5	21	64	15	3.2	9.8784	30.1056	7.056	m	0
P5.6	5	21	64	15	2.81833	8.7002	26.5149	6.21443	m	9	8.1	21.8	29.7	2.03	27	6.83502	90.9091	10.3	359.25	1187.25	1.35228	31.7576	72.3259	0.619043	9.14388	51.4	19	29.4	16	19.1	34	53.2	1.0359	0.3042	0.1958	0.0892	0.3044	0.3018	0.18345	0.0975	0.11	6.91787
P6.1	6	21	34	45	2.33333	7.203	11.662	15.435	m	8	8.1	20.5	30.1	1.785	27.095	5.93215	90.0185	9.475	266.062	1085.06	0.684092	15.3259	35.8487	0.289506	20.4639	54	19	20.95	8.5	25.1	26.5	42.75	1.56665	0.3663	0.176	0.0767	0.33405	0.28385	0.179075	0.097075	0.1191	8.72662
P6.2	6	21	34	45	2.34167	7.22872	11.7036	15.4901	m	9	8.5	20.4667	30.2	2.67	26.63	8.83337	88.1878	10.875	166.688	1062.19	1.33489	41.8023	80.4755	0.648397	9.4744	43.5	18	22.3	14.5	34.25	32.5	41.9	1.26405	0.50165	0.21385	0.0698	0.30605	0.29875	0.16875	0.09785	0.1073	8.80188
P6.3	6	21	34	45	2.35	7.25445	11.7453	15.5452	m	5	11.7667	19.6667	31.7	3.14	27.62	9.88095	87.152	9.4	389.25	1201.5	1.28612	9.42356	48.0073	0.5244	13.2465	50.8	19.5	21.45	16.5	27.75	34.5	52.7	1.08745	0.54325	0.22925	0.09865	0.29045	0.3129	0.2105	0.0909	0.11445	13.773
P6.4	6	21	34	45	2.4	7.4088	11.9952	15.876	m	0
P6.5	6	21	34	45	2.39167	7.38307	11.9535	15.8209	m	6	10.7	20.125	31.45	3.03	27.34	9.64531	86.9227	10	341.25	1241.25	0.878893	14.3197	40.6865	0.383506	15.5678	52.15	20.5	26.9	14	21	33	52.9	1.34435	0.46455	0.208	0.0881	0.3115	0.3108	0.2016	0.10785	0.108075	10.4109
P6.6	6	21	34	45	2.36	7.28532	11.7953	15.6114	m	8	9.25	20.7	30.8	1.89	27.83	6.13263	90.3616	11.55	199.875	1000.88	0.555995	4.19848	20.8783	0.285328	27.3195	49.2	17.5	22.25	13	28.55	29.5	47.3	1.5007	0.38695	0.1708	0.0649	0.27295	0.3015	0.18605	0.092375	0.1142	10.7414
P7.1	7	30	40	30	2.55	11.2455	14.994	11.2455	m	11	9.42	20.05	29.8	2.465	26.175	8.25073	87.8612	9.825	186.562	1050.56	0.809579	21.3362	45.6235	0.353372	16.2553	42.35	18	35.95	18	21.75	36	55.05	1.3903	0.46175	0.1908	0.0667	0.278	0.28245	0.164475	0.08955	0.14165
P7.2	7	30	40	30	2.75	12.1275	16.17	12.1275	m	7	9.6	18.75	30.1	3.385	25.48	11.2248	84.6726	8.5	132	816	0.745941	19.8393	42.2176	0.285431	22.4326	52.3	20.5	22.3	17	25.4	37	47.95	1.3292	0.49315	0.2438	0.098	0.2868	0.28905	0.1812	0.1053	0.11505	10.4324
P7.3	7	30	40	30	2.84667	12.5538	16.7384	12.5538	m	9	8.54	21.2	30.3	2.715	26.5	8.95872	87.4599	10.975	253.312	1175.81	0.969173	5.11688	33.2917	0.466238	15.6941	49.35	20.5	24.4	11.5	26.25	30.5	49.25	1.3218	0.49475	0.22595	0.11085	0.2976	0.28835	0.194025	0.112075	0.120275	9.20794
P7.4	7	30	40	30	2.4	10.584	14.112	10.584	m	7	8.8	20.4	30.6	3.05	26.44	9.96732	86.4052	10.5	338.25	1238.25	1.28223	19.6557	58.1226	0.598375	10.1589	60.6	17	16.3	8	23	26	48.8	1.429	0.5001	0.232	0.0777	0.3815	0.2852	0.1687	0.0952	0.1273	16.3127
P7.5	7	30	40	30	2.66667	11.76	15.68	11.76	m	7	8.62	20.55	33.05	3.795	28.26	11.4909	85.4985	11.35	203.25	1218	1.4095	14.699	56.8587	0.714429	9.71608	47	18.5	19.55	13.5	33.45	32.5	45.75	1.47765	0.53325	0.27255	0.10085	0.30705	0.31185	0.198675	0.1046	0.129025	8.02672
P7.6	7	30	40	30	2.56833	11.3263	15.1018	11.3263	m	2
P8.1	8	35	20	45	2.50833	12.9054	7.3745	16.5926	m	9	9.06	20.275	30.7	2.345	27.31	7.63632	88.9595	11.175	137.25	866.25	1.10649			0.55022		43.6	23.5	29.35	18.5	27	41.5	57.2	1.3527	0.407	0.2205	0.09335	0.3163	0.306	0.185575	0.0885	0.1265	10.2596
P8.2	8	35	20	45	2.20833	11.3619	6.4925	14.6081	m	5	11.3	20.35	32.45	2.49	27.77	7.64575	85.5567	11.225	158.062	1130.06	0.728577	16.2633	38.1206	0.350448	17.5709	55.15	24.5	23	16	21.85	39.5	62.25	1.14585	0.35975	0.1726	0.07385	0.28325	0.33055	0.283525	0.094975	0.12385	8.67437
P8.3	8	35	20	45	2.25833	11.6191	6.6395	14.9389	m	8	8.95	20.8	30.3	2.175	27.41	7.1748	90.4516	8.95	140.25	943.5	0.739844	8.06058	26.1082	0.295057	25.0998	42.2	25	28.3	16	29.5	40	50.8	1.3179	0.38495	0.18665	0.07765	0.27055	0.3154	0.182175	0.103225	0.107825	7.47635
P8.4	8	35	20	45	2.79167	14.3631	8.2075	18.4669	m	11	9.02	19.15	28.8	2.8	25.21	9.81994	87.4365	11.95	217.125	1193.62	0.954077	11.8724	40.2617	0.506083	13.5275	52.5	24.5	22.45	16	25.2	39	55.7	1.504	0.4705	0.2468	0.09045	0.28195	0.2817	0.1676	0.0935	0.14	9.32485
P8.5	8	35	20	45	2.75	14.1487	8.085	18.1913	m	7	8.86667	19.9333	29.85	3.035	25.74	10.1941	86.2012	10.8	321.375	1293.38	1.41211	7.82686	47.7478	0.676364	10.7911	45.9	18.5	25.85	16.5	28.3	33.5	50.15	1.32995	0.48065	0.22415	0.0696	0.2798	0.29075	0.182775	0.09725	0.1175	15.6506
P8.6	8	35	20	45	2.87167	14.7747	8.4427	18.9961	m	8	8.43333	19.7	30.8	2.1	27.615	6.81636	89.6604	9.5	198.375	1003.88	1.14101	18.9787	53.209	0.479829	13.2227	40.9	21	33.75	19.5	25.45	39	59.05	0.8932	0.34815	0.2208	0.0873	0.2756	0.3148	0.212825	0.105	0.13375	8.71695
P9.1	9	42	43	15	3	18.522	18.963	6.615	m	7	5	21.4	27.6	2.12	24.6	7.68116	89.1304	10.55	205.875	1155.38	0.825127	16.6517	41.4055	0.386893	15.4961	52.8	23	27.9	14	19.3	37	54.4	1.3851	0.2892	0.1889	0.0643	0.2754	0.287	0.14455	0.0925	0.088	10.7835
P9.2	9	42	43	15	2.93333	18.1104	18.5416	6.468	m	0
P9.3	9	42	43	15	2.80167	17.2975	17.7093	6.17767	m	4	12.2667	18.5	33.6	5.47	27.23	16.2798	81.0417	10.35	240.375	1169.62	2.19772	28.7244	94.6561	1.00841	6.31757	61.1	19	17.75	12	21.15	30.5	48.7	1.524	0.83625	0.4208	0.1555	0.28035	0.29235	0.203025	0.106	0.11875	14.0216
P9.4	9	42	43	15	2.85833	17.6473	18.0675	6.30262	m	0
P9.5	9	42	43	15	2.85	17.5959	18.0148	6.28425	m	0
P9.6	9	42	43	15	2.96167	18.2853	18.7207	6.53048	m	8	8.15	19.35	27.6	1.995	24.725	7.19988	89.5965	10.725	181.688	1146.94	0.967059	5.2505	34.2623	0.453451	16.3836	47.95	26	29.1	20.5	22.95	45	62.65	1.1797	0.41935	0.2038	0.08115	0.2742	0.27215	0.156975	0.096575	0.098075	5.13636
P10.1	10	50	20	30	2.68333	19.7225	7.889	11.8335	m	10	10.35	18.625	29.75	2.61	26.43	8.6688	88.975	11.075	318.562	1214.06	0.479197	6.6468	20.0865	0.236846	28.2447	49.75	22.5	22.8	14	27.4	34	46.2	1.49165	0.4292	0.17215	0.07395	0.295	0.2762	0.167825	0.1066	0.14855	8.74442
P10.2	10	50	20	30	2.86667	21.07	8.428	12.642	m	0
P10.3	10	50	20	30	2.51667	18.4975	7.399	11.0985	m	6	8.7	20.9	31.1	3.365	26.915	10.8307	86.5304	8.95	408.375	1213.88	1.34997	24.1062	64.6054	0.533019	10.3759	50.65	25	22.1	15.5	27.3	37.5	52	1.3271	0.5768	0.3059	0.1075	0.2952	0.3003	0.196725	0.1045	0.11575	13.1549
P10.4	10	50	20	30	3.265	23.9977	9.5991	14.3986	m	8	8.325	21.375	30.4	3.3	26.085	10.8455	85.8156	10.575	241.312	1193.06	0.747487	15.4729	37.8975	0.352284	17.2082	52.65	21	17.05	13.5	30.3	33	41	1.5084	0.4993	0.2539	0.0926	0.2608	0.29125	0.157375	0.10175	0.119	13.0096
P10.5	10	50	20	30	3.15	23.1525	9.261	13.8915	m	7	9.45	19.3	30.2	3.11	25.735	10.2939	85.2215	9.575	246.188	1107.94	1.12544	32.3118	65.132	0.478928	11.7566	41.6	18	29.05	15	29.4	33	47.45	1.3962	0.6363	0.28795	0.09265	0.2524	0.3024	0.1605	0.106625	0.122425	15.1753
P10.6	10	50	20	30	2.87833	21.1558	8.4623	12.6935	m	2	10.7	20.05	32.5	2.305	29.135	7.0788	89.6698	9.225	274.688	1068.94	0.964483	22.5332	51.4677	0.397341	14.3715	51.1	26.5	21.95	16	27.05	41.5	57.9	1.25565	0.34325	0.1752	0.08	0.2891	0.3111	0.2416	0.10155	0.125025	10.4179

## Sheet: Supp Data 6
Supplementary Table 6. Chi-sq comparison of GAM models for all variables
model0 <-gam(response ~ 1, data=data_list[[1]])
model1 <-gam(response ~ s(litter, k=4), data=data_list[[1]])
model2 <-gam(response ~ s(eaten.P, eaten.C, eaten.F, k=18), data=data_list[[1]])
model3 <-gam(response ~ s(eaten.P, eaten.C, eaten.F, k=18) + s(litter, k=4), data=data_list[[1]])
F0		F1 - males		F1 - females
		male_wean.weight		fem_wean.weight
		> anova(model0, model2, test="Chisq")		> anova(model0, model2, test="Chisq")
		Analysis of Deviance Table		Analysis of Deviance Table
		Model 1: wean ~ 1		Model 1: wean ~ 1
		Model 2: wean ~ s(eaten.P, eaten.C, eaten.F, k = 18)		Model 2: wean ~ s(eaten.P, eaten.C, eaten.F, k = 18)
		Resid. Df Resid. Dev Df Deviance Pr(>Chi)		Resid. Df Resid. Dev Df Deviance Pr(>Chi)
		1 50 93.767		1 49.000 74.896
		2 41 78.859 9 14.908 0.5594		2 36.596 53.153 12.404 21.743 0.2399
		> anova(model1, model3, test="Chisq")		> anova(model1, model3, test="Chisq")
		Analysis of Deviance Table		Analysis of Deviance Table
		Model 1: wean ~ s(litter, k = 4)		Model 1: wean ~ s(litter, k = 4)
		Model 2: wean ~ s(eaten.P, eaten.C, eaten.F, k = 18) + s(litter, k = 4)		Model 2: wean ~ s(eaten.P, eaten.C, eaten.F, k = 18) + s(litter, k = 4)
		Resid. Df Resid. Dev Df Deviance Pr(>Chi)		Resid. Df Resid. Dev Df Deviance Pr(>Chi)
		1 47.066 53.074		1 46.223 47.667
		2 38.085 45.435 8.9804 7.6391 0.6928		2 34.259 34.081 11.964 13.586 0.2799
growth		m_growth		f_growth
> anova(model0,model,test="Chisq")		> anova(model0, model2, test="Chisq")		> anova(model0, model2, test="Chisq")
Analysis of Deviance Table		Analysis of Deviance Table		Analysis of Deviance Table
Model 1: growth ~ 1		Model 1: growth ~ 1		Model 1: growth ~ 1
Model 2: growth ~ s(eaten.P, eaten.C, eaten.F, k = 12)		Model 2: growth ~ s(eaten.P, eaten.C, eaten.F, k = 18)		Model 2: growth ~ s(eaten.P, eaten.C, eaten.F, k = 18)
Resid. Df Resid. Dev Df Deviance Pr(>Chi)		Resid. Df Resid. Dev Df Deviance Pr(>Chi)		Resid. Df Resid. Dev Df Deviance Pr(>Chi)
1 59 763.69		1 50 56.414		1 47 48.458
2 50 281.79 9 481.9 1.293e-14 ***		2 41 52.952 9 3.4621 0.9756		2 38 36.427 9 12.031 0.1841
		> anova(model1, model3, test="Chisq")		> anova(model1, model3, test="Chisq")
		Analysis of Deviance Table		Analysis of Deviance Table
		Model 1: growth ~ s(litter, k = 4)		Model 1: growth ~ s(litter, k = 4)
		Model 2: growth ~ s(eaten.P, eaten.C, eaten.F, k = 18) + s(litter, k = 4)		Model 2: growth ~ s(eaten.P, eaten.C, eaten.F, k = 18) + s(litter, k = 4)
		Resid. Df Resid. Dev Df Deviance Pr(>Chi)		Resid. Df Resid. Dev Df Deviance Pr(>Chi)
		1 48.389 53.364		1 45.484 41.859
		2 39.726 50.411 8.6632 2.9528 0.9808		2 32.412 26.949 13.072 14.909 0.1334
weight		m_weight		f_weight
> anova(model0,model,test="Chisq")		> anova(model0, model2, test="Chisq")		> anova(model0, model2, test="Chisq")
Analysis of Deviance Table		Analysis of Deviance Table		Analysis of Deviance Table
Model 1: weight ~ 1		Model 1: weight ~ 1		Model 1: weight ~ 1
Model 2: weight ~ s(eaten.P, eaten.C, eaten.F, k = 12)		Model 2: weight ~ s(eaten.P, eaten.C, eaten.F, k = 18)		Model 2: weight ~ s(eaten.P, eaten.C, eaten.F, k = 18)
Resid. Df Resid. Dev Df Deviance Pr(>Chi)		Resid. Df Resid. Dev Df Deviance Pr(>Chi)		Resid. Df Resid. Dev Df Deviance Pr(>Chi)
1 59.000 779.13		1 50 118.53		1 48.000 131.320
2 49.363 336.35 9.6375 442.78 2.401e-10 ***		2 41 104.21 9 14.319 0.776		2 31.668 65.008 16.332 66.312 0.007178 **
		> anova(model1, model3, test="Chisq")		> anova(model1, model3, test="Chisq")
		Analysis of Deviance Table		Analysis of Deviance Table
		Model 1: weight ~ s(litter, k = 4)		Model 1: weight ~ s(litter, k = 4)
		Model 2: weight ~ s(eaten.P, eaten.C, eaten.F, k = 18) + s(litter, k = 4)		Model 2: weight ~ s(eaten.P, eaten.C, eaten.F, k = 18) + s(litter, k = 4)
		Resid. Df Resid. Dev Df Deviance Pr(>Chi)		Resid. Df Resid. Dev Df Deviance Pr(>Chi)
		1 48.123 76.455		1 45.227 90.694
		2 39.780 68.843 8.3427 7.6119 0.8428		2 30.270 34.313 14.958 56.382 7.397e-06 ***
fat		m_fat		f_fat
> anova(model0,model,test="Chisq")		> anova(model0, model2, test="Chisq")		> anova(model0, model2, test="Chisq")
Analysis of Deviance Table		Analysis of Deviance Table		Analysis of Deviance Table
Model 1: fat ~ 1		Model 1: fat ~ 1		Model 1: fat ~ 1
Model 2: fat ~ s(eaten.P, eaten.C, eaten.F, k = 12)		Model 2: fat ~ s(eaten.P, eaten.C, eaten.F, k = 18)		Model 2: fat ~ s(eaten.P, eaten.C, eaten.F, k = 18)
Resid. Df Resid. Dev Df Deviance Pr(>Chi)		Resid. Df Resid. Dev Df Deviance Pr(>Chi)		Resid. Df Resid. Dev Df Deviance Pr(>Chi)
1 59.000 442.99		1 50 29.263		1 48.000 47.370
2 48.956 210.69 10.044 232.3 4.206e-08 ***		2 41 24.410 9 4.8526 0.519		2 31.614 22.031 16.386 25.34 0.001982 **
		> anova(model1, model3, test="Chisq")		> anova(model1, model3, test="Chisq")
		Analysis of Deviance Table		Analysis of Deviance Table
		Model 1: fat ~ s(litter, k = 4)		Model 1: fat ~ s(litter, k = 4)
		Model 2: fat ~ s(eaten.P, eaten.C, eaten.F, k = 18) + s(litter, k = 4)		Model 2: fat ~ s(eaten.P, eaten.C, eaten.F, k = 18) + s(litter, k = 4)
		Resid. Df Resid. Dev Df Deviance Pr(>Chi)		Resid. Df Resid. Dev Df Deviance Pr(>Chi)
		1 47.075 23.904		1 45.340 35.937
		2 40.000 21.572 7.0746 2.3314 0.7491		2 30.412 13.647 14.928 22.29 6.766e-06 ***
lean		m_lean		f_lean
> anova(model0,model,test="Chisq")		> anova(model0, model2, test="Chisq")		> anova(model0, model2, test="Chisq")
Analysis of Deviance Table		Analysis of Deviance Table		Analysis of Deviance Table
Model 1: lean ~ 1		Model 1: lean ~ 1		Model 1: lean ~ 1
Model 2: lean ~ s(eaten.P, eaten.C, eaten.F, k = 12)		Model 2: lean ~ s(eaten.P, eaten.C, eaten.F, k = 18)		Model 2: lean ~ s(eaten.P, eaten.C, eaten.F, k = 18)
Resid. Df Resid. Dev Df Deviance Pr(>Chi)		Resid. Df Resid. Dev Df Deviance Pr(>Chi)		Resid. Df Resid. Dev Df Deviance Pr(>Chi)
1 59 190.672		1 50.000 77.043		1 48.000 38.463
2 50 67.468 9 123.2 8.902e-16 ***		2 38.286 53.314 11.714 23.728 0.1194		2 32.242 21.672 15.758 16.791 0.0482 *
		> anova(model1, model3, test="Chisq")		> anova(model1, model3, test="Chisq")
		Analysis of Deviance Table		Analysis of Deviance Table
		Model 1: lean ~ s(litter, k = 4)		Model 1: lean ~ s(litter, k = 4)
		Model 2: lean ~ s(eaten.P, eaten.C, eaten.F, k = 18) + s(litter, k = 4)		Model 2: lean ~ s(eaten.P, eaten.C, eaten.F, k = 18) + s(litter, k = 4)
		Resid. Df Resid. Dev Df Deviance Pr(>Chi)		Resid. Df Resid. Dev Df Deviance Pr(>Chi)
		1 48.473 58.562		1 45.874 29.269
		2 34.098 34.202 14.375 24.36 0.03389 *		2 30.447 13.750 15.426 15.52 0.00241 **
perc.fat		m_perc.fat		f_perc.fat
> anova(model0,model,test="Chisq")		> anova(model0, model2, test="Chisq")		> anova(model0, model2, test="Chisq")
Analysis of Deviance Table		Analysis of Deviance Table		Analysis of Deviance Table
Model 1: perc.fat ~ 1		Model 1: perc.fat ~ 1		Model 1: perc.fat ~ 1
Model 2: perc.fat ~ s(eaten.P, eaten.C, eaten.F, k = 12)		Model 2: perc.fat ~ s(eaten.P, eaten.C, eaten.F, k = 18)		Model 2: perc.fat ~ s(eaten.P, eaten.C, eaten.F, k = 18)
Resid. Df Resid. Dev Df Deviance Pr(>Chi)		Resid. Df Resid. Dev Df Deviance Pr(>Chi)		Resid. Df Resid. Dev Df Deviance Pr(>Chi)
1 59.000 2902.5		1 50 246.82		1 48.000 511.71
2 49.029 1359.2 9.9711 1543.3 1.906e-08 ***		2 41 194.57 9 52.253 0.275		2 31.694 245.26 16.306 266.45 0.003559 **
		> anova(model1, model3, test="Chisq")		> anova(model1, model3, test="Chisq")
		Analysis of Deviance Table		Analysis of Deviance Table
		Model 1: perc.fat ~ s(litter, k = 4)		Model 1: perc.fat ~ s(litter, k = 4)
		Model 2: perc.fat ~ s(eaten.P, eaten.C, eaten.F, k = 18) + s(litter, k = 4)		Model 2: perc.fat ~ s(eaten.P, eaten.C, eaten.F, k = 18) + s(litter, k = 4)
		Resid. Df Resid. Dev Df Deviance Pr(>Chi)		Resid. Df Resid. Dev Df Deviance Pr(>Chi)
		1 49 235.74		1 46.632 420.83
		2 40 182.31 9 53.428 0.2294		2 30.555 166.24 16.077 254.59 4.016e-05 ***
perc.lean		m_perc.lean		f_perc.lean
> anova(model0,model,test="Chisq")		> anova(model0, model2, test="Chisq")		> anova(model0, model2, test="Chisq")
Analysis of Deviance Table		Analysis of Deviance Table		Analysis of Deviance Table
Model 1: perc.lean ~ 1		Model 1: perc.lean ~ 1		Model 1: perc.lean ~ 1
Model 2: perc.lean ~ s(eaten.P, eaten.C, eaten.F, k = 12)		Model 2: perc.lean ~ s(eaten.P, eaten.C, eaten.F, k = 18)		Model 2: perc.lean ~ s(eaten.P, eaten.C, eaten.F, k = 18)
Resid. Df Resid. Dev Df Deviance Pr(>Chi)		Resid. Df Resid. Dev Df Deviance Pr(>Chi)		Resid. Df Resid. Dev Df Deviance Pr(>Chi)
1 59.000 2539.7		1 50 246.67		1 48 446.37
2 48.972 1227.5 10.028 1312.2 8.395e-08 ***		2 41 206.95 9 39.724 0.5473		2 39 358.73 9 87.642 0.39
		> anova(model1, model3, test="Chisq")		> anova(model1, model3, test="Chisq")
		Analysis of Deviance Table		Analysis of Deviance Table
		Model 1: perc.lean ~ s(litter, k = 4)		Model 1: perc.lean ~ s(litter, k = 4)
		Model 2: perc.lean ~ s(eaten.P, eaten.C, eaten.F, k = 18) + s(litter, k = 4)		Model 2: perc.lean ~ s(eaten.P, eaten.C, eaten.F, k = 18) + s(litter, k = 4)
		Resid. Df Resid. Dev Df Deviance Pr(>Chi)		Resid. Df Resid. Dev Df Deviance Pr(>Chi)
		1 47.034 203.58		1 47.000 383.70
		2 38.021 153.74 9.0133 49.841 0.1939		2 30.601 156.35 16.399 227.34 0.0001126 ***
basal.glucose		m_basal.glucose		f_basal.glucose
> anova(model0,model,test="Chisq")		> anova(model0, model2, test="Chisq")		> anova(model0, model2, test="Chisq")
Analysis of Deviance Table		Analysis of Deviance Table		Analysis of Deviance Table
Model 1: basal.glucose ~ 1		Model 1: basal.glucose ~ 1		Model 1: basal.glucose ~ 1
Model 2: basal.glucose ~ s(eaten.P, eaten.C, eaten.F, k = 12)		Model 2: basal.glucose ~ s(eaten.P, eaten.C, eaten.F, k = 18)		Model 2: basal.glucose ~ s(eaten.P, eaten.C, eaten.F, k = 18)
Resid. Df Resid. Dev Df Deviance Pr(>Chi)		Resid. Df Resid. Dev Df Deviance Pr(>Chi)		Resid. Df Resid. Dev Df Deviance Pr(>Chi)
1 59.000 141.09		1 50 38.824		1 48.000 26.759
2 49.348 102.10 9.6522 38.993 0.03491 *		2 41 30.787 9 8.0369 0.2966		2 38.235 17.666 9.7647 9.0934 0.02737 *
		> anova(model1, model3, test="Chisq")		> anova(model1, model3, test="Chisq")
		Analysis of Deviance Table		Analysis of Deviance Table
		Model 1: basal.glucose ~ s(litter, k = 4)		Model 1: basal.glucose ~ s(litter, k = 4)
		Model 2: basal.glucose ~ s(eaten.P, eaten.C, eaten.F, k = 18) + s(litter, k = 4)		Model 2: basal.glucose ~ s(eaten.P, eaten.C, eaten.F, k = 18) + s(litter, k = 4)
		Resid. Df Resid. Dev Df Deviance Pr(>Chi)		Resid. Df Resid. Dev Df Deviance Pr(>Chi)
		1 49 36.501		1 47.000 26.150
		2 40 29.624 9 6.8777 0.4112		2 35.489 15.368 11.511 10.782 0.009696 **
glucose.iAUC		m_glucose.iAUC		f_glucose.iAUC
> anova(model0,model,test="Chisq")		> anova(model0, model2, test="Chisq")		> anova(model0, model2, test="Chisq")
Analysis of Deviance Table		Analysis of Deviance Table		Analysis of Deviance Table
Model 1: glucose.iAUC ~ 1		Model 1: glucose.iAUC ~ 1		Model 1: glucose.iAUC ~ 1
Model 2: glucose.iAUC ~ s(eaten.P, eaten.C, eaten.F, k = 12)		Model 2: glucose.iAUC ~ s(eaten.P, eaten.C, eaten.F, k = 18)		Model 2: glucose.iAUC ~ s(eaten.P, eaten.C, eaten.F, k = 18)
Resid. Df Resid. Dev Df Deviance Pr(>Chi)		Resid. Df Resid. Dev Df Deviance Pr(>Chi)		Resid. Df Resid. Dev Df Deviance Pr(>Chi)
1 59 1393438		1 50.000 248053		1 48.000 314910
2 50 875156 9 518282 0.0005108 ***		2 35.439 159344 14.561 88709 0.1322		2 37.229 235649 10.771 79260 0.2909
		> anova(model1, model3, test="Chisq")		> anova(model1, model3, test="Chisq")
		Analysis of Deviance Table		Analysis of Deviance Table
		Model 1: glucose.iAUC ~ s(litter, k = 4)		Model 1: glucose.iAUC ~ s(litter, k = 4)
		Model 2: glucose.iAUC ~ s(eaten.P, eaten.C, eaten.F, k = 18) + s(litter, k = 4)		Model 2: glucose.iAUC ~ s(eaten.P, eaten.C, eaten.F, k = 18) + s(litter, k = 4)
		Resid. Df Resid. Dev Df Deviance Pr(>Chi)		Resid. Df Resid. Dev Df Deviance Pr(>Chi)
		1 49.000 242172		1 47.00 314333
		2 30.672 106825 18.328 135347 0.002087 **		2 36.09 234152 10.91 80181 0.3102
basal.insulin		m_basal.insulin		f_basal.insulin
> anova(model0,model,test="Chisq")		> anova(model0, model2, test="Chisq")		> anova(model0, model2, test="Chisq")
Analysis of Deviance Table		Analysis of Deviance Table		Analysis of Deviance Table
Model 1: basal.insulin ~ 1		Model 1: basal.insulin ~ 1		Model 1: basal.insulin ~ 1
Model 2: basal.insulin ~ s(eaten.P, eaten.C, eaten.F, k = 12)		Model 2: basal.insulin ~ s(eaten.P, eaten.C, eaten.F, k = 18)		Model 2: basal.insulin ~ s(eaten.P, eaten.C, eaten.F, k = 18)
Resid. Df Resid. Dev Df Deviance Pr(>Chi)		Resid. Df Resid. Dev Df Deviance Pr(>Chi)		Resid. Df Resid. Dev Df Deviance Pr(>Chi)
1 59 17.2422		1 50 5.3947		1 48 3.2940
2 50 9.8649 9 7.3772 2.241e-05 ***		2 41 3.9639 9 1.4308 0.09662 .		2 39 2.4305 9 0.86351 0.1275
		> anova(model1, model3, test="Chisq")		> anova(model1, model3, test="Chisq")
		Analysis of Deviance Table		Analysis of Deviance Table
		Model 1: basal.insulin ~ s(litter, k = 4)		Model 1: basal.insulin ~ s(litter, k = 4)
		Model 2: basal.insulin ~ s(eaten.P, eaten.C, eaten.F, k = 18) + s(litter, k = 4)		Model 2: basal.insulin ~ s(eaten.P, eaten.C, eaten.F, k = 18) + s(litter, k = 4)
		Resid. Df Resid. Dev Df Deviance Pr(>Chi)		Resid. Df Resid. Dev Df Deviance Pr(>Chi)
		1 49.000 5.0709		1 47 3.0014
		2 39.757 3.5943 9.2429 1.4766 0.06586 .		2 38 2.2191 9 0.7823 0.1455
insulin.iAUC		m_insulin.iAUC		f_insulin.iAUC
> anova(model0,model,test="Chisq")		> anova(model0, model2, test="Chisq")		> anova(model0, model2, test="Chisq")
Analysis of Deviance Table		Analysis of Deviance Table		Analysis of Deviance Table
Model 1: insulin.iAUC ~ 1		Model 1: insulin.iAUC ~ 1		Model 1: insulin.iAUC ~ 1
Model 2: insulin.iAUC ~ s(eaten.P, eaten.C, eaten.F, k = 12)		Model 2: insulin.iAUC ~ s(eaten.P, eaten.C, eaten.F, k = 18)		Model 2: insulin.iAUC ~ s(eaten.P, eaten.C, eaten.F, k = 18)
Resid. Df Resid. Dev Df Deviance Pr(>Chi)		Resid. Df Resid. Dev Df Deviance Pr(>Chi)		Resid. Df Resid. Dev Df Deviance Pr(>Chi)
1 56 2629.2		1 49 6705.1		1 45 635.11
2 47 2399.9 9 229.32 0.8762		2 40 5987.5 9 717.6 0.8519		2 36 510.78 9 124.33 0.4595
		> anova(model1, model3, test="Chisq")		> anova(model1, model3, test="Chisq")
		Analysis of Deviance Table		Analysis of Deviance Table
		Model 1: insulin.iAUC ~ s(litter, k = 4)		Model 1: insulin.iAUC ~ s(litter, k = 4)
		Model 2: insulin.iAUC ~ s(eaten.P, eaten.C, eaten.F, k = 18) + s(litter, k = 4)		Model 2: insulin.iAUC ~ s(eaten.P, eaten.C, eaten.F, k = 18) + s(litter, k = 4)
		Resid. Df Resid. Dev Df Deviance Pr(>Chi)		Resid. Df Resid. Dev Df Deviance Pr(>Chi)
		1 48 6612.9		1 44 633.29
		2 39 5980.1 9 632.85 0.9028		2 35 506.95 9 126.34 0.4633
HOMA		m_HOMA		f_HOMA
> anova(model0,model,test="Chisq")		> anova(model0, model2, test="Chisq")		> anova(model0, model2, test="Chisq")
Analysis of Deviance Table		Analysis of Deviance Table		Analysis of Deviance Table
Model 1: HOMA ~ 1		Model 1: HOMA ~ 1		Model 1: HOMA ~ 1
Model 2: HOMA ~ s(eaten.P, eaten.C, eaten.F, k = 12)		Model 2: HOMA ~ s(eaten.P, eaten.C, eaten.F, k = 18)		Model 2: HOMA ~ s(eaten.P, eaten.C, eaten.F, k = 18)
Resid. Df Resid. Dev Df Deviance Pr(>Chi)		Resid. Df Resid. Dev Df Deviance Pr(>Chi)		Resid. Df Resid. Dev Df Deviance Pr(>Chi)
1 59 4.5062		1 50 1.28148		1 48 0.36455
2 50 2.5589 9 1.9474 1.707e-05 ***		2 41 0.89108 9 0.39039 0.03561 *		2 39 0.28107 9 0.083476 0.2379
		> anova(model1, model3, test="Chisq")		> anova(model1, model3, test="Chisq")
		Analysis of Deviance Table		Analysis of Deviance Table
		Model 1: HOMA ~ s(litter, k = 4)		Model 1: HOMA ~ s(litter, k = 4)
		Model 2: HOMA ~ s(eaten.P, eaten.C, eaten.F, k = 18) + s(litter, k = 4)		Model 2: HOMA ~ s(eaten.P, eaten.C, eaten.F, k = 18) + s(litter, k = 4)
		Resid. Df Resid. Dev Df Deviance Pr(>Chi)		Resid. Df Resid. Dev Df Deviance Pr(>Chi)
		1 49 1.24820		1 47 0.33124
		2 40 0.84425 9 0.40395 0.02404 *		2 38 0.25506 9 0.07618 0.2525
Matsuda		m_Matsuda		f_Matsuda
> anova(model0,model,test="Chisq")		> anova(model0, model2, test="Chisq")		> anova(model0, model2, test="Chisq")
Analysis of Deviance Table		Analysis of Deviance Table		Analysis of Deviance Table
Model 1: Matsuda ~ 1		Model 1: Matsuda ~ 1		Model 1: Matsuda ~ 1
Model 2: Matsuda ~ s(eaten.P, eaten.C, eaten.F, k = 12)		Model 2: Matsuda ~ s(eaten.P, eaten.C, eaten.F, k = 18)		Model 2: Matsuda ~ s(eaten.P, eaten.C, eaten.F, k = 18)
Resid. Df Resid. Dev Df Deviance Pr(>Chi)		Resid. Df Resid. Dev Df Deviance Pr(>Chi)		Resid. Df Resid. Dev Df Deviance Pr(>Chi)
1 56.000 12292.7		1 49 1286.2		1 45 3065.1
2 45.496 7179.6 10.504 5113.1 0.000422 ***		2 40 1012.5 9 273.71 0.2887		2 36 2528.7 9 536.33 0.5713
		> anova(model1, model3, test="Chisq")		> anova(model1, model3, test="Chisq")
		Analysis of Deviance Table		Analysis of Deviance Table
		Model 1: Matsuda ~ s(litter, k = 4)		Model 1: Matsuda ~ s(litter, k = 4)
		Model 2: Matsuda ~ s(eaten.P, eaten.C, eaten.F, k = 18) + s(litter, k = 4)		Model 2: Matsuda ~ s(eaten.P, eaten.C, eaten.F, k = 18) + s(litter, k = 4)
		Resid. Df Resid. Dev Df Deviance Pr(>Chi)		Resid. Df Resid. Dev Df Deviance Pr(>Chi)
		1 48 1232.65		1 44 2761.2
		2 39 939.57 9 293.08 0.2041		2 35 2152.9 9 608.32 0.3595
closed.perc		m_closed.perc		f_closed.perc
> anova(model0,model,test="Chisq")		> anova(model0, model2, test="Chisq")		> anova(model0, model2, test="Chisq")
Analysis of Deviance Table		Analysis of Deviance Table		Analysis of Deviance Table
Model 1: closed.perc ~ 1		Model 1: closed.perc ~ 1		Model 1: closed.perc ~ 1
Model 2: closed.perc ~ s(eaten.P, eaten.C, eaten.F, k = 12)		Model 2: closed.perc ~ s(eaten.P, eaten.C, eaten.F, k = 18)		Model 2: closed.perc ~ s(eaten.P, eaten.C, eaten.F, k = 18)
Resid. Df Resid. Dev Df Deviance Pr(>Chi)		Resid. Df Resid. Dev Df Deviance Pr(>Chi)		Resid. Df Resid. Dev Df Deviance Pr(>Chi)
1 59 5063.4		1 49 1453.66		1 48.000 1939.8
2 50 3735.6 9 1327.8 0.03791 *		2 40 989.93 9 463.73 0.02751 *		2 37.352 1476.7 10.648 463.08 0.3399
		> anova(model1, model3, test="Chisq")		> anova(model1, model3, test="Chisq")
		Analysis of Deviance Table		Analysis of Deviance Table
		Model 1: closed.perc ~ s(litter, k = 4)		Model 1: closed.perc ~ s(litter, k = 4)
		Model 2: closed.perc ~ s(eaten.P, eaten.C, eaten.F, k = 18) + s(litter, k = 4)		Model 2: closed.perc ~ s(eaten.P, eaten.C, eaten.F, k = 18) + s(litter, k = 4)
		Resid. Df Resid. Dev Df Deviance Pr(>Chi)		Resid. Df Resid. Dev Df Deviance Pr(>Chi)
		1 48 1398.35		1 45.088 1662.7
		2 39 963.87 9 434.48 0.04037 *		2 35.967 1318.3 9.1212 344.42 0.3932
				Analysis of Deviance Table
				Model 1: closed.perc ~ Estrus + s(PatID, bs = "re")
				Model 2: closed.perc ~ s(eaten.P, eaten.C, eaten.F, k = 18) + Estrus + s(PatID, bs = "re")
				Resid. Df Resid. Dev Df Deviance Pr(>Chi)
				1 81.980 6494.0
				2 75.122 5926.1 6.8583 567.93 0.3856
closed.bout		m_closed.bout		f_closed.bout
> anova(model0,model,test="Chisq")		> anova(model0, model2, test="Chisq")		> anova(model0, model2, test="Chisq")
Analysis of Deviance Table		Analysis of Deviance Table		Analysis of Deviance Table
Model 1: closed.bout ~ 1		Model 1: closed.bout ~ 1		Model 1: closed.bout ~ 1
Model 2: closed.bout ~ s(eaten.P, eaten.C, eaten.F, k = 12)		Model 2: closed.bout ~ s(eaten.P, eaten.C, eaten.F, k = 18)		Model 2: closed.bout ~ s(eaten.P, eaten.C, eaten.F, k = 18)
Resid. Df Resid. Dev Df Deviance Pr(>Chi)		Resid. Df Resid. Dev Df Deviance Pr(>Chi)		Resid. Df Resid. Dev Df Deviance Pr(>Chi)
1 59 744.98		1 49.000 534.32		1 48 355.99
2 50 704.81 9 40.169 0.97		2 37.464 385.63 11.536 148.69 0.2212		2 39 315.42 9 40.567 0.8329
		> anova(model1, model3, test="Chisq")		> anova(model1, model3, test="Chisq")
		Analysis of Deviance Table		Analysis of Deviance Table
		Model 1: closed.bout ~ s(litter, k = 4)		Model 1: closed.bout ~ s(litter, k = 4)
		Model 2: closed.bout ~ s(eaten.P, eaten.C, eaten.F, k = 18) + s(litter, k = 4)		Model 2: closed.bout ~ s(eaten.P, eaten.C, eaten.F, k = 18) + s(litter, k = 4)
		Resid. Df Resid. Dev Df Deviance Pr(>Chi)		Resid. Df Resid. Dev Df Deviance Pr(>Chi)
		1 46.619 506.88		1 47 354.96
		2 35.373 365.54 11.246 141.34 0.24		2 38 313.82 9 41.136 0.836
				Analysis of Deviance Table
				Model 1: closed.bout ~ Estrus + s(PatID, bs = "re")
				Model 2: closed.bout ~ s(eaten.P, eaten.C, eaten.F, k = 18) + Estrus + s(PatID, bs = "re")
				Resid. Df Resid. Dev Df Deviance Pr(>Chi)
				1 86 1114.0
				2 77 1009.4 9 104.7 0.5354
open.perc		m_open.perc		f_open.perc
> anova(model0,model,test="Chisq")		> anova(model0, model2, test="Chisq")		> anova(model0, model2, test="Chisq")
Analysis of Deviance Table		Analysis of Deviance Table		Analysis of Deviance Table
Model 1: open.perc ~ 1		Model 1: open.perc ~ 1		Model 1: open.perc ~ 1
Model 2: open.perc ~ s(eaten.P, eaten.C, eaten.F, k = 12)		Model 2: open.perc ~ s(eaten.P, eaten.C, eaten.F, k = 18)		Model 2: open.perc ~ s(eaten.P, eaten.C, eaten.F, k = 18)
Resid. Df Resid. Dev Df Deviance Pr(>Chi)		Resid. Df Resid. Dev Df Deviance Pr(>Chi)		Resid. Df Resid. Dev Df Deviance Pr(>Chi)
1 59 3220.0		1 49 1547.2		1 48.000 1834.4
2 50 2292.9 9 927.11 0.01662 *		2 40 1308.6 9 238.56 0.6067		2 36.255 1329.5 11.745 504.91 0.2717
		> anova(model1, model3, test="Chisq")		> anova(model1, model3, test="Chisq")
		Analysis of Deviance Table		Analysis of Deviance Table
		Model 1: open.perc ~ s(litter, k = 4)		Model 1: open.perc ~ s(litter, k = 4)
		Model 2: open.perc ~ s(eaten.P, eaten.C, eaten.F, k = 18) + s(litter, k = 4)		Model 2: open.perc ~ s(eaten.P, eaten.C, eaten.F, k = 18) + s(litter, k = 4)
		Resid. Df Resid. Dev Df Deviance Pr(>Chi)		Resid. Df Resid. Dev Df Deviance Pr(>Chi)
		1 48 1491.9		1 47.000 1814.5
		2 39 1270.5 9 221.45 0.6581		2 35.586 1324.9 11.414 489.59 0.2901
				Analysis of Deviance Table
				Model 1: open.perc ~ Estrus + s(PatID, bs = "re")
				Model 2: open.perc ~ s(eaten.P, eaten.C, eaten.F, k = 18) + Estrus + s(PatID, bs = "re")
				Resid. Df Resid. Dev Df Deviance Pr(>Chi)
				1 55.336 2798.9
				2 52.562 2536.9 2.7746 261.98 0.08073 .
open.bout		m_open.bout		f_open.bout
> anova(model0,model,test="Chisq")		> anova(model0, model2, test="Chisq")		> anova(model0, model2, test="Chisq")
Analysis of Deviance Table		Analysis of Deviance Table		Analysis of Deviance Table
Model 1: open.bout ~ 1		Model 1: open.bout ~ 1		Model 1: open.bout ~ 1
Model 2: open.bout ~ s(eaten.P, eaten.C, eaten.F, k = 12)		Model 2: open.bout ~ s(eaten.P, eaten.C, eaten.F, k = 18)		Model 2: open.bout ~ s(eaten.P, eaten.C, eaten.F, k = 18)
Resid. Df Resid. Dev Df Deviance Pr(>Chi)		Resid. Df Resid. Dev Df Deviance Pr(>Chi)		Resid. Df Resid. Dev Df Deviance Pr(>Chi)
1 59 856.58		1 49.000 432.62		1 48.000 550.49
2 50 570.05 9 286.53 0.002828 **		2 37.574 314.07 11.426 118.55 0.2294		2 33.507 372.20 14.493 178.29 0.2975
		> anova(model1, model3, test="Chisq")		> anova(model1, model3, test="Chisq")
		Analysis of Deviance Table		Analysis of Deviance Table
		Model 1: open.bout ~ s(litter, k = 4)		Model 1: open.bout ~ s(litter, k = 4)
		Model 2: open.bout ~ s(eaten.P, eaten.C, eaten.F, k = 18) + s(litter, k = 4)		Model 2: open.bout ~ s(eaten.P, eaten.C, eaten.F, k = 18) + s(litter, k = 4)
		Resid. Df Resid. Dev Df Deviance Pr(>Chi)		Resid. Df Resid. Dev Df Deviance Pr(>Chi)
		1 48.000 424.09		1 47.000 532.29
		2 36.868 313.56 11.132 110.53 0.2828		2 33.182 376.28 13.818 156.01 0.4074
				Analysis of Deviance Table
				Model 1: open.bout ~ Estrus + s(PatID, bs = "re")
				Model 2: open.bout ~ s(eaten.P, eaten.C, eaten.F, k = 18) + Estrus + s(PatID, bs = "re")
				Resid. Df Resid. Dev Df Deviance Pr(>Chi)
				1 60.824 1070.29
				2 54.692 923.03 6.1319 147.26 0.1297
centre.perc		m_centre.perc		f_centre.perc
> anova(model0,model,test="Chisq")		> anova(model0, model2, test="Chisq")		> anova(model0, model2, test="Chisq")
Analysis of Deviance Table		Analysis of Deviance Table		Analysis of Deviance Table
Model 1: centre.perc ~ 1		Model 1: centre.perc ~ 1		Model 1: centre.perc ~ 1
Model 2: centre.perc ~ s(eaten.P, eaten.C, eaten.F, k = 12)		Model 2: centre.perc ~ s(eaten.P, eaten.C, eaten.F, k = 18)		Model 2: centre.perc ~ s(eaten.P, eaten.C, eaten.F, k = 18)
Resid. Df Resid. Dev Df Deviance Pr(>Chi)		Resid. Df Resid. Dev Df Deviance Pr(>Chi)		Resid. Df Resid. Dev Df Deviance Pr(>Chi)
1 59 2479.2		1 49.000 739.52		1 48 630.28
2 50 1886.5 9 592.63 0.07326 .		2 35.744 405.74 13.256 333.78 0.00438 **		2 39 619.48 9 10.799 0.9999
		> anova(model1, model3, test="Chisq")		> anova(model1, model3, test="Chisq")
		Analysis of Deviance Table		Analysis of Deviance Table
		Model 1: centre.perc ~ s(litter, k = 4)		Model 1: centre.perc ~ s(litter, k = 4)
		Model 2: centre.perc ~ s(eaten.P, eaten.C, eaten.F, k = 18) + s(litter, k = 4)		Model 2: centre.perc ~ s(eaten.P, eaten.C, eaten.F, k = 18) + s(litter, k = 4)
		Resid. Df Resid. Dev Df Deviance Pr(>Chi)		Resid. Df Resid. Dev Df Deviance Pr(>Chi)
		1 48.000 739.52		1 47 594.82
		2 34.943 409.15 13.057 330.37 0.005968 **		2 38 578.64 9 16.18 0.9993
				Analysis of Deviance Table
				Model 1: centre.perc ~ Estrus + s(PatID, bs = "re")
				Model 2: centre.perc ~ s(eaten.P, eaten.C, eaten.F, k = 18) + Estrus + s(PatID, bs = "re")
				Resid. Df Resid. Dev Df Deviance Pr(>Chi)
				1 86 2320.5
				2 77 2263.4 9 57.12 0.9923
centre.bout		m_centre.bout		f_centre.bout
> anova(model0,model,test="Chisq")		> anova(model0, model2, test="Chisq")		> anova(model0, model2, test="Chisq")
Analysis of Deviance Table		Analysis of Deviance Table		Analysis of Deviance Table
Model 1: centre.bout ~ 1		Model 1: centre.bout ~ 1		Model 1: centre.bout ~ 1
Model 2: centre.bout ~ s(eaten.P, eaten.C, eaten.F, k = 12)		Model 2: centre.bout ~ s(eaten.P, eaten.C, eaten.F, k = 18)		Model 2: centre.bout ~ s(eaten.P, eaten.C, eaten.F, k = 18)
Resid. Df Resid. Dev Df Deviance Pr(>Chi)		Resid. Df Resid. Dev Df Deviance Pr(>Chi)		Resid. Df Resid. Dev Df Deviance Pr(>Chi)
1 59 1521.0		1 49.00 1076.00		1 48 1120.13
2 50 1067.8 9 453.21 0.0117 *		2 36.77 680.98 12.23 395.02 0.04064 *		2 39 967.29 9 152.84 0.7236
		> anova(model1, model3, test="Chisq")		> anova(model1, model3, test="Chisq")
		Analysis of Deviance Table		Analysis of Deviance Table
		Model 1: centre.bout ~ s(litter, k = 4)		Model 1: centre.bout ~ s(litter, k = 4)
		Model 2: centre.bout ~ s(eaten.P, eaten.C, eaten.F, k = 18) + s(litter, k = 4)		Model 2: centre.bout ~ s(eaten.P, eaten.C, eaten.F, k = 18) + s(litter, k = 4)
		Resid. Df Resid. Dev Df Deviance Pr(>Chi)		Resid. Df Resid. Dev Df Deviance Pr(>Chi)
		1 47.504 1059.22		1 47 1097.37
		2 35.892 679.88 11.611 379.34 0.04722 *		2 38 940.23 9 157.14 0.7043
				Analysis of Deviance Table
				Model 1: centre.bout ~ Estrus + s(PatID, bs = "re")
				Model 2: centre.bout ~ s(eaten.P, eaten.C, eaten.F, k = 18) + Estrus + s(PatID, bs = "re")
				Resid. Df Resid. Dev Df Deviance Pr(>Chi)
				1 81.570 3526.7
				2 76.442 3265.4 5.1281 261.25 0.3074
fast		m_fast		f_fast
> anova(model0,model,test="Chisq")		> anova(model0, model2, test="Chisq")		> anova(model0, model2, test="Chisq")
Analysis of Deviance Table		Analysis of Deviance Table		Analysis of Deviance Table
Model 1: fast ~ 1		Model 1: fast ~ 1		Model 1: fast ~ 1
Model 2: fast ~ s(eaten.P, eaten.C, eaten.F, k = 12)		Model 2: fast ~ s(eaten.P, eaten.C, eaten.F, k = 18)		Model 2: fast ~ s(eaten.P, eaten.C, eaten.F, k = 18)
Resid. Df Resid. Dev Df Deviance Pr(>Chi)		Resid. Df Resid. Dev Df Deviance Pr(>Chi)		Resid. Df Resid. Dev Df Deviance Pr(>Chi)
1 59.000 19194		1 49.000 1578.5		1 48 2108.7
2 48.369 11488 10.631 7706.7 0.0004559 ***		2 37.382 1013.4 11.618 565.19 0.03792 *		2 39 1608.3 9 500.38 0.2059
		> anova(model1, model3, test="Chisq")		> anova(model1, model3, test="Chisq")
		Analysis of Deviance Table		Analysis of Deviance Table
		Model 1: fast ~ s(litter, k = 4)		Model 1: fast ~ s(litter, k = 4)
		Model 2: fast ~ s(eaten.P, eaten.C, eaten.F, k = 18) + s(litter, k = 4)		Model 2: fast ~ s(eaten.P, eaten.C, eaten.F, k = 18) + s(litter, k = 4)
		Resid. Df Resid. Dev Df Deviance Pr(>Chi)		Resid. Df Resid. Dev Df Deviance Pr(>Chi)
		1 47.765 1550.9		1 47 2106.8
		2 36.068 975.0 11.698 575.86 0.03326 *		2 38 1607.9 9 498.89 0.2254
				Analysis of Deviance Table
				Model 1: fast ~ Estrus + s(PatID, bs = "re")
				Model 2: fast ~ s(eaten.P, eaten.C, eaten.F, k = 18) + Estrus + s(PatID, bs = "re")
				Resid. Df Resid. Dev Df Deviance Pr(>Chi)
				1 60.976 3981.3
				2 60.186 3836.6 0.78993 144.75 0.08146 .
liver		m_liver		f_liver
> anova(model0,model,test="Chisq")		> anova(model0, model2, test="Chisq")		> anova(model0, model2, test="Chisq")
Analysis of Deviance Table		Analysis of Deviance Table		Analysis of Deviance Table
Model 1: liver ~ 1		Model 1: liver ~ 1		Model 1: liver ~ 1
Model 2: liver ~ s(eaten.P, eaten.C, eaten.F, k = 12)		Model 2: liver ~ s(eaten.P, eaten.C, eaten.F, k = 18)		Model 2: liver ~ s(eaten.P, eaten.C, eaten.F, k = 18)
Resid. Df Resid. Dev Df Deviance Pr(>Chi)		Resid. Df Resid. Dev Df Deviance Pr(>Chi)		Resid. Df Resid. Dev Df Deviance Pr(>Chi)
1 59 3.8569		1 50.000 1.2679		1 47.000 0.58177
2 50 2.0327 9 1.8241 9.754e-07 ***		2 36.635 1.0163 13.365 0.25157 0.7637		2 36.054 0.45709 10.946 0.12468 0.5205
		> anova(model1, model3, test="Chisq")		> anova(model1, model3, test="Chisq")
		Analysis of Deviance Table		Analysis of Deviance Table
		Model 1: liver ~ s(litter, k = 4)		Model 1: liver ~ s(litter, k = 4)
		Model 2: liver ~ s(eaten.P, eaten.C, eaten.F, k = 18) + s(litter, k = 4)		Model 2: liver ~ s(eaten.P, eaten.C, eaten.F, k = 18) + s(litter, k = 4)
		Resid. Df Resid. Dev Df Deviance Pr(>Chi)		Resid. Df Resid. Dev Df Deviance Pr(>Chi)
		1 49.000 1.26300		1 45.704 0.56620
		2 35.343 0.98577 13.657 0.27723 0.7115		2 34.982 0.44956 10.722 0.11664 0.5696
gWAT		m_gWAT		f_gWAT
> anova(model0,model,test="Chisq")		> anova(model0, model2, test="Chisq")		> anova(model0, model2, test="Chisq")
Analysis of Deviance Table		Analysis of Deviance Table		Analysis of Deviance Table
Model 1: gWAT ~ 1		Model 1: gWAT ~ 1		Model 1: gWAT ~ 1
Model 2: gWAT ~ s(eaten.P, eaten.C, eaten.F, k = 12)		Model 2: gWAT ~ s(eaten.P, eaten.C, eaten.F, k = 18)		Model 2: gWAT ~ s(eaten.P, eaten.C, eaten.F, k = 18)
Resid. Df Resid. Dev Df Deviance Pr(>Chi)		Resid. Df Resid. Dev Df Deviance Pr(>Chi)		Resid. Df Resid. Dev Df Deviance Pr(>Chi)
1 59 16.2787		1 50 0.84728		1 48 1.4861
2 50 9.0303 9 7.2484 7.186e-06 ***		2 41 0.72847 9 0.11881 0.6697		2 39 1.1412 9 0.3449 0.2256
		> anova(model1, model3, test="Chisq")		> anova(model1, model3, test="Chisq")
		Analysis of Deviance Table		Analysis of Deviance Table
		Model 1: gWAT ~ s(litter, k = 4)		Model 1: gWAT ~ s(litter, k = 4)
		Model 2: gWAT ~ s(eaten.P, eaten.C, eaten.F, k = 18) + s(litter, k = 4)		Model 2: gWAT ~ s(eaten.P, eaten.C, eaten.F, k = 18) + s(litter, k = 4)
		Resid. Df Resid. Dev Df Deviance Pr(>Chi)		Resid. Df Resid. Dev Df Deviance Pr(>Chi)
		1 47.124 0.71317		1 47 1.15838
		2 40.000 0.67173 7.1243 0.041439 0.9348		2 38 0.82002 9 0.33836 0.07388 .
sWAT		m_sWAT		f_sWAT
> anova(model0,model,test="Chisq")		> anova(model0, model2, test="Chisq")		> anova(model0, model2, test="Chisq")
Analysis of Deviance Table		Analysis of Deviance Table		Analysis of Deviance Table
Model 1: sWAT ~ 1		Model 1: sWAT ~ 1		Model 1: sWAT ~ 1
Model 2: sWAT ~ s(eaten.P, eaten.C, eaten.F, k = 12)		Model 2: sWAT ~ s(eaten.P, eaten.C, eaten.F, k = 18)		Model 2: sWAT ~ s(eaten.P, eaten.C, eaten.F, k = 18)
Resid. Df Resid. Dev Df Deviance Pr(>Chi)		Resid. Df Resid. Dev Df Deviance Pr(>Chi)		Resid. Df Resid. Dev Df Deviance Pr(>Chi)
1 59 9.0509		1 50 0.15602		1 48 0.48205
2 50 5.5391 9 3.5119 0.0002243 ***		2 41 0.12817 9 0.02785 0.4457		2 39 0.37128 9 0.11077 0.2346
		> anova(model1, model3, test="Chisq")		> anova(model1, model3, test="Chisq")
		Analysis of Deviance Table		Analysis of Deviance Table
		Model 1: sWAT ~ s(litter, k = 4)		Model 1: sWAT ~ s(litter, k = 4)
		Model 2: sWAT ~ s(eaten.P, eaten.C, eaten.F, k = 18) + s(litter, k = 4)		Model 2: sWAT ~ s(eaten.P, eaten.C, eaten.F, k = 18) + s(litter, k = 4)
		Resid. Df Resid. Dev Df Deviance Pr(>Chi)		Resid. Df Resid. Dev Df Deviance Pr(>Chi)
		1 49 0.14206		1 47 0.41900
		2 40 0.11646 9 0.025595 0.4568		2 38 0.30169 9 0.11731 0.09728 .
BAT		m_BAT		f_BAT
> anova(model0,model,test="Chisq")		> anova(model0, model2, test="Chisq")		> anova(model0, model2, test="Chisq")
Analysis of Deviance Table		Analysis of Deviance Table		Analysis of Deviance Table
Model 1: BAT ~ 1		Model 1: BAT ~ 1		Model 1: BAT ~ 1
Model 2: BAT ~ s(eaten.P, eaten.C, eaten.F, k = 12)		Model 2: BAT ~ s(eaten.P, eaten.C, eaten.F, k = 18)		Model 2: BAT ~ s(eaten.P, eaten.C, eaten.F, k = 18)
Resid. Df Resid. Dev Df Deviance Pr(>Chi)		Resid. Df Resid. Dev Df Deviance Pr(>Chi)		Resid. Df Resid. Dev Df Deviance Pr(>Chi)
1 59 0.40810		1 50 0.021705		1 48 0.018039
2 50 0.19565 9 0.21245 1.661e-08 ***		2 41 0.018169 9 0.0035367 0.5361		2 39 0.010368 9 0.0076709 0.0006855 ***
		> anova(model1, model3, test="Chisq")		> anova(model1, model3, test="Chisq")
		Analysis of Deviance Table		Analysis of Deviance Table
		Model 1: BAT ~ s(litter, k = 4)		Model 1: BAT ~ s(litter, k = 4)
		Model 2: BAT ~ s(eaten.P, eaten.C, eaten.F, k = 18) + s(litter, k = 4)		Model 2: BAT ~ s(eaten.P, eaten.C, eaten.F, k = 18) + s(litter, k = 4)
		Resid. Df Resid. Dev Df Deviance Pr(>Chi)		Resid. Df Resid. Dev Df Deviance Pr(>Chi)
		1 48.698 0.019094		1 47 0.018021
		2 40.000 0.016195 8.6976 0.0028993 0.5908		2 38 0.010152 9 0.0078695 0.0005424 ***
Quad		m_Quad		f_Quad
> anova(model0,model,test="Chisq")		> anova(model0, model2, test="Chisq")		> anova(model0, model2, test="Chisq")
Analysis of Deviance Table		Analysis of Deviance Table		Analysis of Deviance Table
Model 1: quad ~ 1		Model 1: quad ~ 1		Model 1: quad ~ 1
Model 2: quad ~ s(eaten.P, eaten.C, eaten.F, k = 12)		Model 2: quad ~ s(eaten.P, eaten.C, eaten.F, k = 18)		Model 2: quad ~ s(eaten.P, eaten.C, eaten.F, k = 18)
Resid. Df Resid. Dev Df Deviance Pr(>Chi)		Resid. Df Resid. Dev Df Deviance Pr(>Chi)		Resid. Df Resid. Dev Df Deviance Pr(>Chi)
1 59 0.26520		1 50.000 0.043755		1 48 0.44042
2 50 0.18739 9 0.077812 0.01375 *		2 37.172 0.030209 12.828 0.013546 0.1779		2 39 0.28554 9 0.15488 0.01199 *
		> anova(model1, model3, test="Chisq")		> anova(model1, model3, test="Chisq")
		Analysis of Deviance Table		Analysis of Deviance Table
		Model 1: quad ~ s(litter, k = 4)		Model 1: quad ~ s(litter, k = 4)
		Model 2: quad ~ s(eaten.P, eaten.C, eaten.F, k = 18) + s(litter, k = 4)		Model 2: quad ~ s(eaten.P, eaten.C, eaten.F, k = 18) + s(litter, k = 4)
		Resid. Df Resid. Dev Df Deviance Pr(>Chi)		Resid. Df Resid. Dev Df Deviance Pr(>Chi)
		1 49.000 0.042423		1 46.007 0.41955
		2 36.278 0.029592 12.722 0.012831 0.2163		2 36.641 0.25259 9.3658 0.16695 0.004472 **
Gastroc		m_Gastroc		f_Gastroc
> anova(model0,model,test="Chisq")		> anova(model0, model2, test="Chisq")		> anova(model0, model2, test="Chisq")
Analysis of Deviance Table		Analysis of Deviance Table		Analysis of Deviance Table
Model 1: gastroc ~ 1		Model 1: gastroc ~ 1		Model 1: gastroc ~ 1
Model 2: gastroc ~ s(eaten.P, eaten.C, eaten.F, k = 12)		Model 2: gastroc ~ s(eaten.P, eaten.C, eaten.F, k = 18)		Model 2: gastroc ~ s(eaten.P, eaten.C, eaten.F, k = 18)
Resid. Df Resid. Dev Df Deviance Pr(>Chi)		Resid. Df Resid. Dev Df Deviance Pr(>Chi)		Resid. Df Resid. Dev Df Deviance Pr(>Chi)
1 59 0.063361		1 50.000 0.019769		1 48.000 0.026104
2 50 0.042865 9 0.020497 0.004448 **		2 38.442 0.015901 11.558 0.003867 0.6146		2 32.473 0.014099 15.527 0.012005 0.02023 *
		> anova(model1, model3, test="Chisq")		> anova(model1, model3, test="Chisq")
		Analysis of Deviance Table		Analysis of Deviance Table
		Model 1: gastroc ~ s(litter, k = 4)		Model 1: gastroc ~ s(litter, k = 4)
		Model 2: gastroc ~ s(eaten.P, eaten.C, eaten.F, k = 18) + s(litter, k = 4)		Model 2: gastroc ~ s(eaten.P, eaten.C, eaten.F, k = 18) + s(litter, k = 4)
		Resid. Df Resid. Dev Df Deviance Pr(>Chi)		Resid. Df Resid. Dev Df Deviance Pr(>Chi)
		1 49.000 0.017516		1 45.674 0.0230941
		2 36.345 0.012723 12.655 0.0047933 0.3349		2 29.253 0.0092981 16.421 0.013796 0.0001266 ***
kidney		m_kidney		f_kidney
> anova(model0,model,test="Chisq")		> anova(model0, model2, test="Chisq")		> anova(model0, model2, test="Chisq")
Analysis of Deviance Table		Analysis of Deviance Table		Analysis of Deviance Table
Model 1: kidney ~ 1		Model 1: kidney ~ 1		Model 1: kidney ~ 1
Model 2: kidney ~ s(eaten.P, eaten.C, eaten.F, k = 12)		Model 2: kidney ~ s(eaten.P, eaten.C, eaten.F, k = 18)		Model 2: kidney ~ s(eaten.P, eaten.C, eaten.F, k = 18)
Resid. Df Resid. Dev Df Deviance Pr(>Chi)		Resid. Df Resid. Dev Df Deviance Pr(>Chi)		Resid. Df Resid. Dev Df Deviance Pr(>Chi)
1 59 0.059457		1 50 0.031625		1 48 0.012196
2 50 0.015294 9 0.044163 < 2.2e-16 ***		2 41 0.024039 9 0.0075857 0.1654		2 39 0.010554 9 0.0016425 0.7329
		> anova(model1, model3, test="Chisq")		> anova(model1, model3, test="Chisq")
		Analysis of Deviance Table		Analysis of Deviance Table
		Model 1: kidney ~ s(litter, k = 4)		Model 1: kidney ~ s(litter, k = 4)
		Model 2: kidney ~ s(eaten.P, eaten.C, eaten.F, k = 18) + s(litter, k = 4)		Model 2: kidney ~ s(eaten.P, eaten.C, eaten.F, k = 18) + s(litter, k = 4)
		Resid. Df Resid. Dev Df Deviance Pr(>Chi)		Resid. Df Resid. Dev Df Deviance Pr(>Chi)
		1 47.970 0.020158		1 45.521 0.0073080
		2 38.854 0.012852 9.1159 0.0073057 0.008501 **		2 36.606 0.0057947 8.9157 0.0015133 0.3705
liver triglycerides		m_liver triglycerides		f_liver triglycerides
> anova(model0,model,test="Chisq")		> anova(model0, model2, test="Chisq")		> anova(model0, model2, test="Chisq")
Analysis of Deviance Table		Analysis of Deviance Table		Analysis of Deviance Table
Model 1: liver.trig ~ 1		Model 1: liver.trig ~ 1		Model 1: liver.trig ~ 1
Model 2: liver.trig ~ s(eaten.P, eaten.C, eaten.F, k = 12)		Model 2: liver.trig ~ s(eaten.P, eaten.C, eaten.F, k = 18)		Model 2: liver.trig ~ s(eaten.P, eaten.C, eaten.F, k = 18)
Resid. Df Resid. Dev Df Deviance Pr(>Chi)		Resid. Df Resid. Dev Df Deviance Pr(>Chi)		Resid. Df Resid. Dev Df Deviance Pr(>Chi)
1 59 23174		1 49.000 682.68		1 47.000 3210.9
2 50 15398 9 7776.5 0.002705 **		2 38.707 520.59 10.293 162.09 0.2915		2 30.685 1566.5 16.315 1644.4 0.007212 **
		> anova(model1, model3, test="Chisq")		> anova(model1, model3, test="Chisq")
		Analysis of Deviance Table		Analysis of Deviance Table
		Model 1: liver.trig ~ s(litter, k = 4)		Model 1: liver.trig ~ s(litter, k = 4)
		Model 2: liver.trig ~ s(eaten.P, eaten.C, eaten.F, k = 18) + s(litter, k = 4)		Model 2: liver.trig ~ s(eaten.P, eaten.C, eaten.F, k = 18) + s(litter,
		Resid. Df Resid. Dev Df Deviance Pr(>Chi)		k = 4)
		1 48.000 666.25		Resid. Df Resid. Dev Df Deviance Pr(>Chi)
		2 37.383 473.65 10.617 192.6 0.1425		1 46.000 3113.7
				2 29.779 1559.8 16.221 1553.8 0.01484 *
testis		m_testis		f_uterus
> anova(model0,model,test="Chisq")		> anova(model0, model2, test="Chisq")		> anova(model0, model2, test="Chisq")
Analysis of Deviance Table		Analysis of Deviance Table		Analysis of Deviance Table
Model 1: testis ~ 1		Model 1: testis ~ 1		Model 1: uterus ~ 1
Model 2: testis ~ s(eaten.P, eaten.C, eaten.F, k = 12)		Model 2: testis ~ s(eaten.P, eaten.C, eaten.F, k = 18)		Model 2: uterus ~ s(eaten.P, eaten.C, eaten.F, k = 18)
Resid. Df Resid. Dev Df Deviance Pr(>Chi)		Resid. Df Resid. Dev Df Deviance Pr(>Chi)		Resid. Df Resid. Dev Df Deviance Pr(>Chi)
1 59 0.0043831		1 50 0.0026794		1 48.00 0.0125613
2 50 0.0033873 9 0.00099582 0.09953 .		2 41 0.0022268 9 0.00045262 0.5009		2 37.86 0.0090725 10.14 0.0034888 0.1479
		> anova(model1, model3, test="Chisq")		> anova(model1, model3, test="Chisq")
		Analysis of Deviance Table		Analysis of Deviance Table
		Model 1: testis ~ s(litter, k = 4)		Model 1: uterus ~ s(litter, k = 4)
		Model 2: testis ~ s(eaten.P, eaten.C, eaten.F, k = 18) + s(litter, k = 4)		Model 2: uterus ~ s(eaten.P, eaten.C, eaten.F, k = 18) + s(litter, k = 4)
		Resid. Df Resid. Dev Df Deviance Pr(>Chi)		Resid. Df Resid. Dev Df Deviance Pr(>Chi)
		1 49.000 0.0026239		1 45.603 0.0109789
		2 39.983 0.0022061 9.0172 0.0004178 0.5793		2 35.136 0.0074325 10.467 0.0035464 0.08245 .
SV		m_SV
> anova(model0,model,test="Chisq")		> anova(model0, model2, test="Chisq")
Analysis of Deviance Table		Analysis of Deviance Table
Model 1: SV ~ 1		Model 1: SV ~ 1
Model 2: SV ~ s(eaten.P, eaten.C, eaten.F, k = 12)		Model 2: SV ~ s(eaten.P, eaten.C, eaten.F, k = 18)
Resid. Df Resid. Dev Df Deviance Pr(>Chi)		Resid. Df Resid. Dev Df Deviance Pr(>Chi)
1 59.000 0.061016		1 50 0.0086618
2 48.667 0.029787 10.333 0.031229 1.892e-07 ***		2 41 0.0070804 9 0.0015815 0.4228
		> anova(model1, model3, test="Chisq")
		Analysis of Deviance Table
		Model 1: SV ~ s(litter, k = 4)
		Model 2: SV ~ s(eaten.P, eaten.C, eaten.F, k = 18) + s(litter, k = 4)
		Resid. Df Resid. Dev Df Deviance Pr(>Chi)
		1 47.216 0.0067728
		2 38.356 0.0055092 8.8609 0.0012636 0.4346
litter
> anova(model0, model2, test="Chisq")
Analysis of Deviance Table
Model 1: litter ~ 1
Model 2: litter ~ s(eaten.P, eaten.C, eaten.F, k = 12)
Resid. Df Resid. Dev Df Deviance Pr(>Chi)
1 59 602.18
2 50 463.78 9 138.41 0.0931 .
sex ratio
> anova(model0, model2, test="Chisq")
Analysis of Deviance Table
Model 1: sex.ratio ~ 1
Model 2: sex.ratio ~ s(eaten.P, eaten.C, eaten.F, k = 12)
Resid. Df Resid. Dev Df Deviance Pr(>Chi)
1 51 2.2086
2 42 1.8373 9 0.37133 0.4858
# female pups
> anova(model0, model2, test="Chisq")
Analysis of Deviance Table
Model 1: female ~ 1
Model 2: female ~ s(eaten.P, eaten.C, eaten.F, k = 12)
Resid. Df Resid. Dev Df Deviance Pr(>Chi)
1 59 242.85
2 50 214.27 9 28.578 0.6716
# male pups
> anova(model0, model2, test="Chisq")
Analysis of Deviance Table
Model 1: male ~ 1
Model 2: male ~ s(eaten.P, eaten.C, eaten.F, k = 12)
Resid. Df Resid. Dev Df Deviance Pr(>Chi)
1 59.000 265.33
2 49.409 188.83 9.5914 76.503 0.02312 *
